# Supplementary material
Source: ML conference proceedings conference paper supplement (https://www.ecva.net/papers/eccv_2020/papers_ECCV/html/123520392_ECCV_2020_paper.php)

Deformed Retrieved  
Deformed  
Scan  
Deformed Retrieved

Human AE Ours Margin Ours Reg

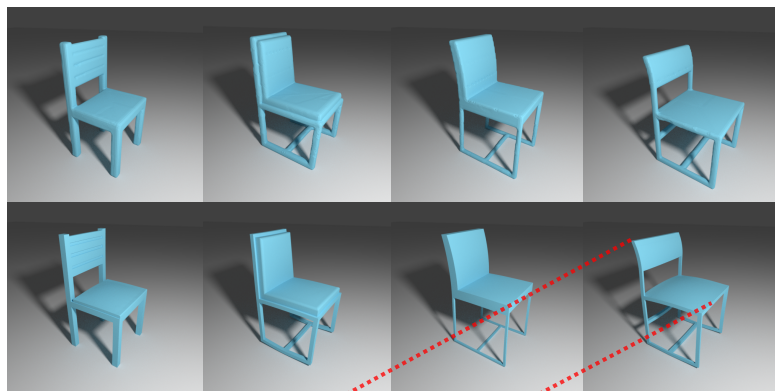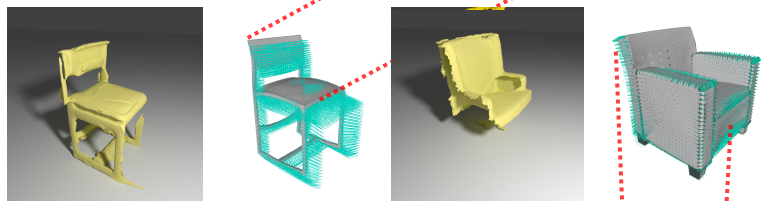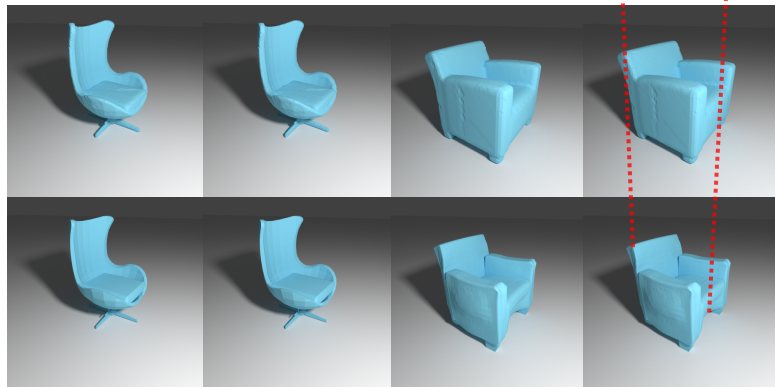

Human AE Ours Margin Ours Reg

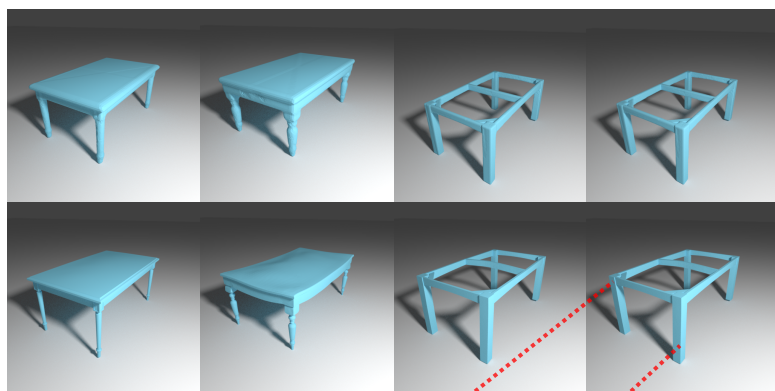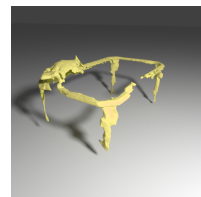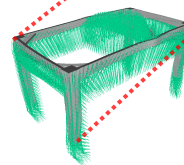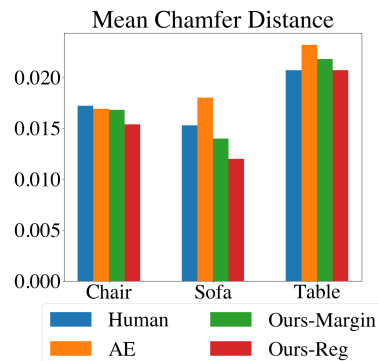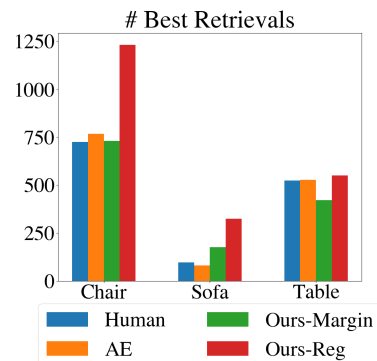

Supplement: Supplementary file 2 [file 123520392-supp.zip]
