# Supplementary material
Source: ML conference proceedings conference paper supplement (https://www.ecva.net/papers/eccv_2020/papers_ECCV/html/123520392_ECCV_2020_paper.php)
Supplement: Supplementary file 5 [file 123520392-supp.zip]

|                 | Retrieval                                                                          | Deformed<br>Watertight                                                              | Deformed<br>CAD                                                                     | Retrieval                                                                            | Deformed<br>Watertight                                                                | Deformed<br>CAD                                                                      | Retrieval                                                                            | Deformed<br>Watertight                                                                | Deformed<br>CAD                                                                      |
|-----------------|------------------------------------------------------------------------------------|-------------------------------------------------------------------------------------|-------------------------------------------------------------------------------------|--------------------------------------------------------------------------------------|---------------------------------------------------------------------------------------|--------------------------------------------------------------------------------------|--------------------------------------------------------------------------------------|---------------------------------------------------------------------------------------|--------------------------------------------------------------------------------------|
| Human<br>Select | 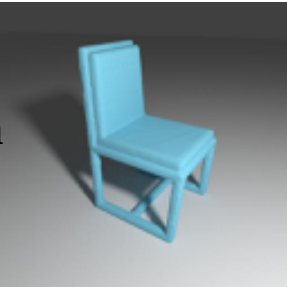  |    |   |   |    |   |   |    |   |
| Auto<br>Encoder |   |    |   |   |    |   |   |    |   |
| Our<br>Triplet  |   |    |   |   |    |   |   |    |   |
| Our<br>SIM      |  |   |  |  |   |  |  |   |  |
| Target          |                                                                                    |  | Chair                                                                               |                                                                                      |  | Sofa                                                                                 |                                                                                      |  | Table                                                                                |
