# Supplementary material
Source: ML conference proceedings conference paper supplement (https://www.ecva.net/papers/eccv_2020/papers_ECCV/html/123520392_ECCV_2020_paper.php)
Supplement: Supplementary file 14 [file 123520392-supp.zip]

Retrieved  
Deformed  
Query  
Retrieved

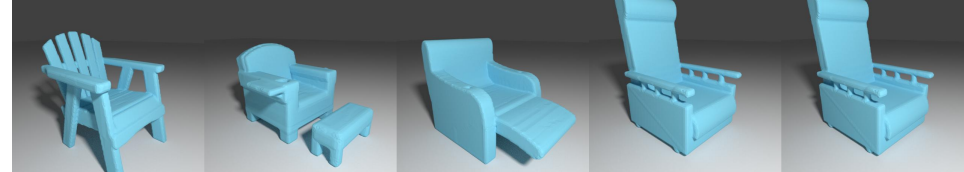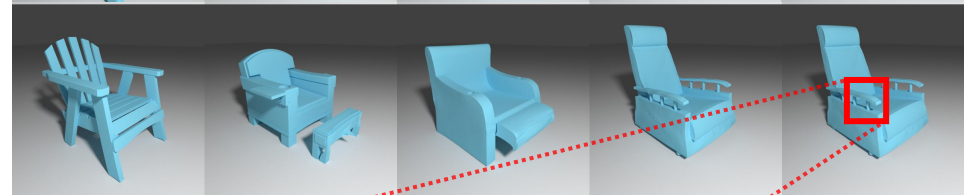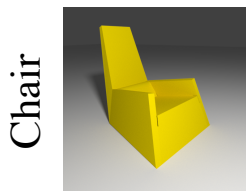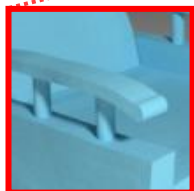

Sofa

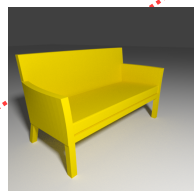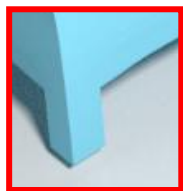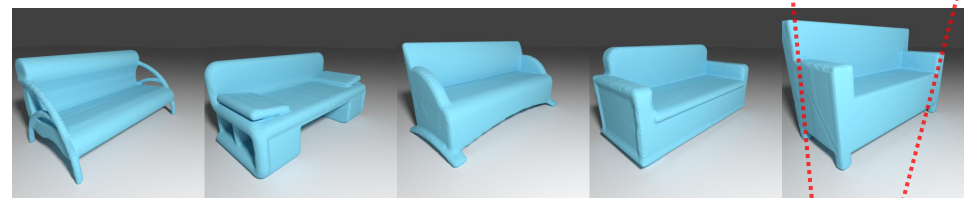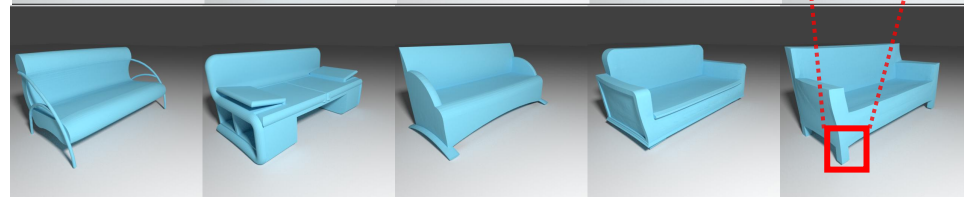

Ranked  
CD

AE

CD  
Margin

Ours  
Margin

Ours  
Reg

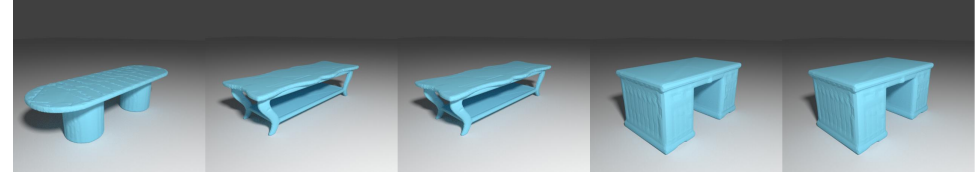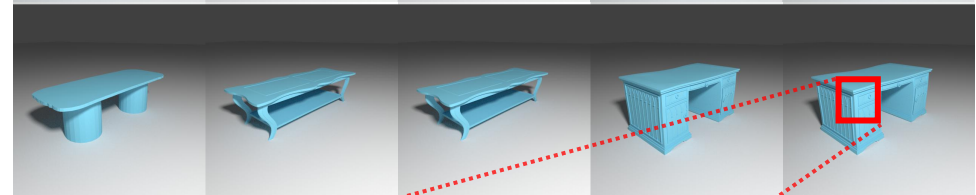

Table

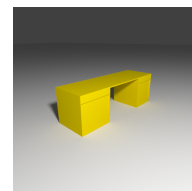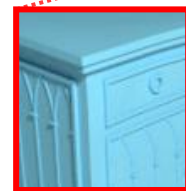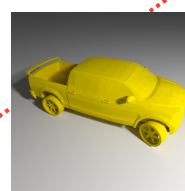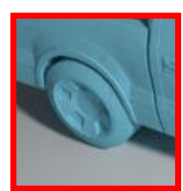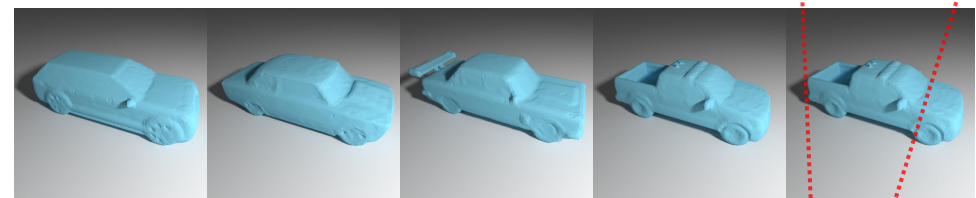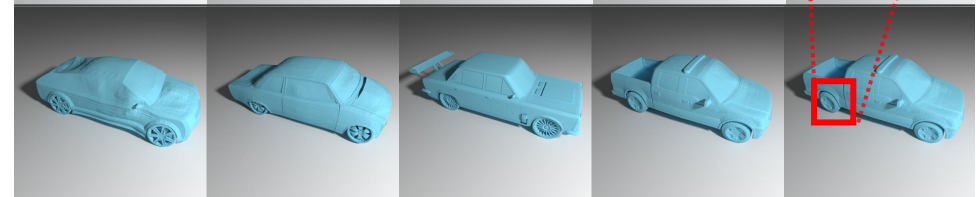

Ranked  
CD

AE

CD  
Margin

Ours  
Margin

Ours  
Reg
