# Supplementary material
Source: ML conference proceedings conference paper supplement (https://www.ecva.net/papers/eccv_2020/papers_ECCV/html/123520392_ECCV_2020_paper.php)
Supplement: Supplementary file 21 [file 123520392-supp.zip]

Archive with 118 entries (113 files):
- 0264-supp/
- __MACOSX/._0264-supp
- 0264-supp/eijkel2.eps
- __MACOSX/0264-supp/._eijkel2.eps
- 0264-supp/splncs04.bst
- __MACOSX/0264-supp/._splncs04.bst
- 0264-supp/sections/
- 0264-supp/ruler.sty
- __MACOSX/0264-supp/._ruler.sty
- 0264-supp/.DS_Store
- __MACOSX/0264-supp/._.DS_Store
- 0264-supp/egbib.bib
- __MACOSX/0264-supp/._egbib.bib
- 0264-supp/compile.sh
- __MACOSX/0264-supp/._compile.sh
- 0264-supp/supp.tex
- __MACOSX/0264-supp/._supp.tex
- 0264-supp/0264-supp.pdf
- __MACOSX/0264-supp/._0264-supp.pdf
- 0264-supp/eso-pic.sty
- __MACOSX/0264-supp/._eso-pic.sty
- 0264-supp/comment.sty
- __MACOSX/0264-supp/._comment.sty
- 0264-supp/llncs.cls
- __MACOSX/0264-supp/._llncs.cls
- 0264-supp/figures/
- 0264-supp/cvpr_eso.sty
- __MACOSX/0264-supp/._cvpr_eso.sty
- 0264-supp/README.txt
- __MACOSX/0264-supp/._README.txt
- 0264-supp/history.txt
- __MACOSX/0264-supp/._history.txt
- 0264-supp/eijkel2.pdf
- __MACOSX/0264-supp/._eijkel2.pdf
- 0264-supp/llncsdoc.pdf
- __MACOSX/0264-supp/._llncsdoc.pdf
- 0264-supp/splncs.bst
- __MACOSX/0264-supp/._splncs.bst
- 0264-supp/header.tex
- __MACOSX/0264-supp/._header.tex
- 0264-supp/0264-supp.tex
- __MACOSX/0264-supp/._0264-supp.tex
- 0264-supp/sections/0abstract.tex
- __MACOSX/0264-supp/sections/._0abstract.tex
- 0264-supp/sections/6experiments.tex
- __MACOSX/0264-supp/sections/._6experiments.tex
- 0264-supp/sections/supplementary.tex
- __MACOSX/0264-supp/sections/._supplementary.tex
- 0264-supp/sections/3problemoverview.tex
- __MACOSX/0264-supp/sections/._3problemoverview.tex
- 0264-supp/sections/7conclusion.tex
- __MACOSX/0264-supp/sections/._7conclusion.tex
- 0264-supp/sections/1introduction.tex
- __MACOSX/0264-supp/sections/._1introduction.tex
- 0264-supp/sections/4approach.tex
- __MACOSX/0264-supp/sections/._4approach.tex
- 0264-supp/sections/5implementation.tex
- __MACOSX/0264-supp/sections/._5implementation.tex
- 0264-supp/sections/2relatedworks.tex
- __MACOSX/0264-supp/sections/._2relatedworks.tex
- 0264-supp/figures/image2cad_more2.pdf
- __MACOSX/0264-supp/figures/._image2cad_more2.pdf
- 0264-supp/figures/scan2cad-vis.pdf
- __MACOSX/0264-supp/figures/._scan2cad-vis.pdf
- 0264-supp/figures/watertight_vs_cad.pdf
- __MACOSX/0264-supp/figures/._watertight_vs_cad.pdf
- 0264-supp/figures/shapenet_supp_1.pdf
- __MACOSX/0264-supp/figures/._shapenet_supp_1.pdf
- 0264-supp/figures/shapenet_supp_2.pdf
- __MACOSX/0264-supp/figures/._shapenet_supp_2.pdf
- 0264-supp/figures/image2cad_more.pdf
- __MACOSX/0264-supp/figures/._image2cad_more.pdf
- 0264-supp/figures/scan2cad_edited.pdf
- __MACOSX/0264-supp/figures/._scan2cad_edited.pdf
- 0264-supp/figures/teaser/
- 0264-supp/figures/image2cad3.pdf
- __MACOSX/0264-supp/figures/._image2cad3.pdf
- 0264-supp/figures/scan2cad2_supp_v2.pdf
- __MACOSX/0264-supp/figures/._scan2cad2_supp_v2.pdf
- 0264-supp/figures/network-crop.pdf
- __MACOSX/0264-supp/figures/._network-crop.pdf
- 0264-supp/figures/embedding_v2.png
- __MACOSX/0264-supp/figures/._embedding_v2.png
- 0264-supp/figures/scan2cad1_supp_v2.pdf
- __MACOSX/0264-supp/figures/._scan2cad1_supp_v2.pdf
- 0264-supp/figures/shapenet_quali_v2-crop.pdf
- __MACOSX/0264-supp/figures/._shapenet_quali_v2-crop.pdf
- 0264-supp/figures/scan2cad_supp_full.pdf
- __MACOSX/0264-supp/figures/._scan2cad_supp_full.pdf
- 0264-supp/figures/asymmetry-crop.pdf
- __MACOSX/0264-supp/figures/._asymmetry-crop.pdf
- 0264-supp/figures/teaser-crop.pdf
- __MACOSX/0264-supp/figures/._teaser-crop.pdf
- 0264-supp/figures/scan2cad_fixed.pdf
- __MACOSX/0264-supp/figures/._scan2cad_fixed.pdf
- 0264-supp/figures/teaser/teaser_1.png
- __MACOSX/0264-supp/figures/teaser/._teaser_1.png
- 0264-supp/figures/teaser/teaser_3.png
- __MACOSX/0264-supp/figures/teaser/._teaser_3.png
- 0264-supp/figures/teaser/source/
- 0264-supp/figures/teaser/teaser_2.png
- __MACOSX/0264-supp/figures/teaser/._teaser_2.png
- 0264-supp/figures/teaser/teaser_5.png
- __MACOSX/0264-supp/figures/teaser/._teaser_5.png
- 0264-supp/figures/teaser/teaser_4.png
- __MACOSX/0264-supp/figures/teaser/._teaser_4.png
- 0264-supp/figures/teaser/source/teaser1.png
- __MACOSX/0264-supp/figures/teaser/source/._teaser1.png
- 0264-supp/figures/teaser/source/source2.png
- __MACOSX/0264-supp/figures/teaser/source/._source2.png
- 0264-supp/figures/teaser/source/closest_cad_new.png
- __MACOSX/0264-supp/figures/teaser/source/._closest_cad_new.png
- 0264-supp/figures/teaser/source/reference_new_yellow.png
- __MACOSX/0264-supp/figures/teaser/source/._reference_new_yellow.png
- 0264-supp/figures/teaser/source/teaser1_manifold.png
- __MACOSX/0264-supp/figures/teaser/source/._teaser1_manifold.png
- 0264-supp/figures/teaser/source/run.sh
- __MACOSX/0264-supp/figures/teaser/source/._run.sh
