# Supplementary material
Source: ML conference proceedings conference paper supplement (https://www.ecva.net/papers/eccv_2020/papers_ECCV/html/123520392_ECCV_2020_paper.php)
Supplement: Supplementary file 21 [file 123520392-supp.zip › 0264-supp/figures/teaser/source/run.sh]

mkdir out
convert reference_new_yellow.png -crop 440x480+72+0 +repage out/teaser_1.png
convert closest_cad_new.png -crop 440x480+72+0 +repage out/teaser_2.png
convert source2.png -crop 440x480+72+0 +repage out/teaser_3.png
convert teaser1_manifold.png -crop 440x480+72+0 +repage out/teaser_4.png
