# Supplementary material
Source: ML conference proceedings conference paper supplement (https://www.ecva.net/papers/eccv_2020/papers_ECCV/html/123520392_ECCV_2020_paper.php)

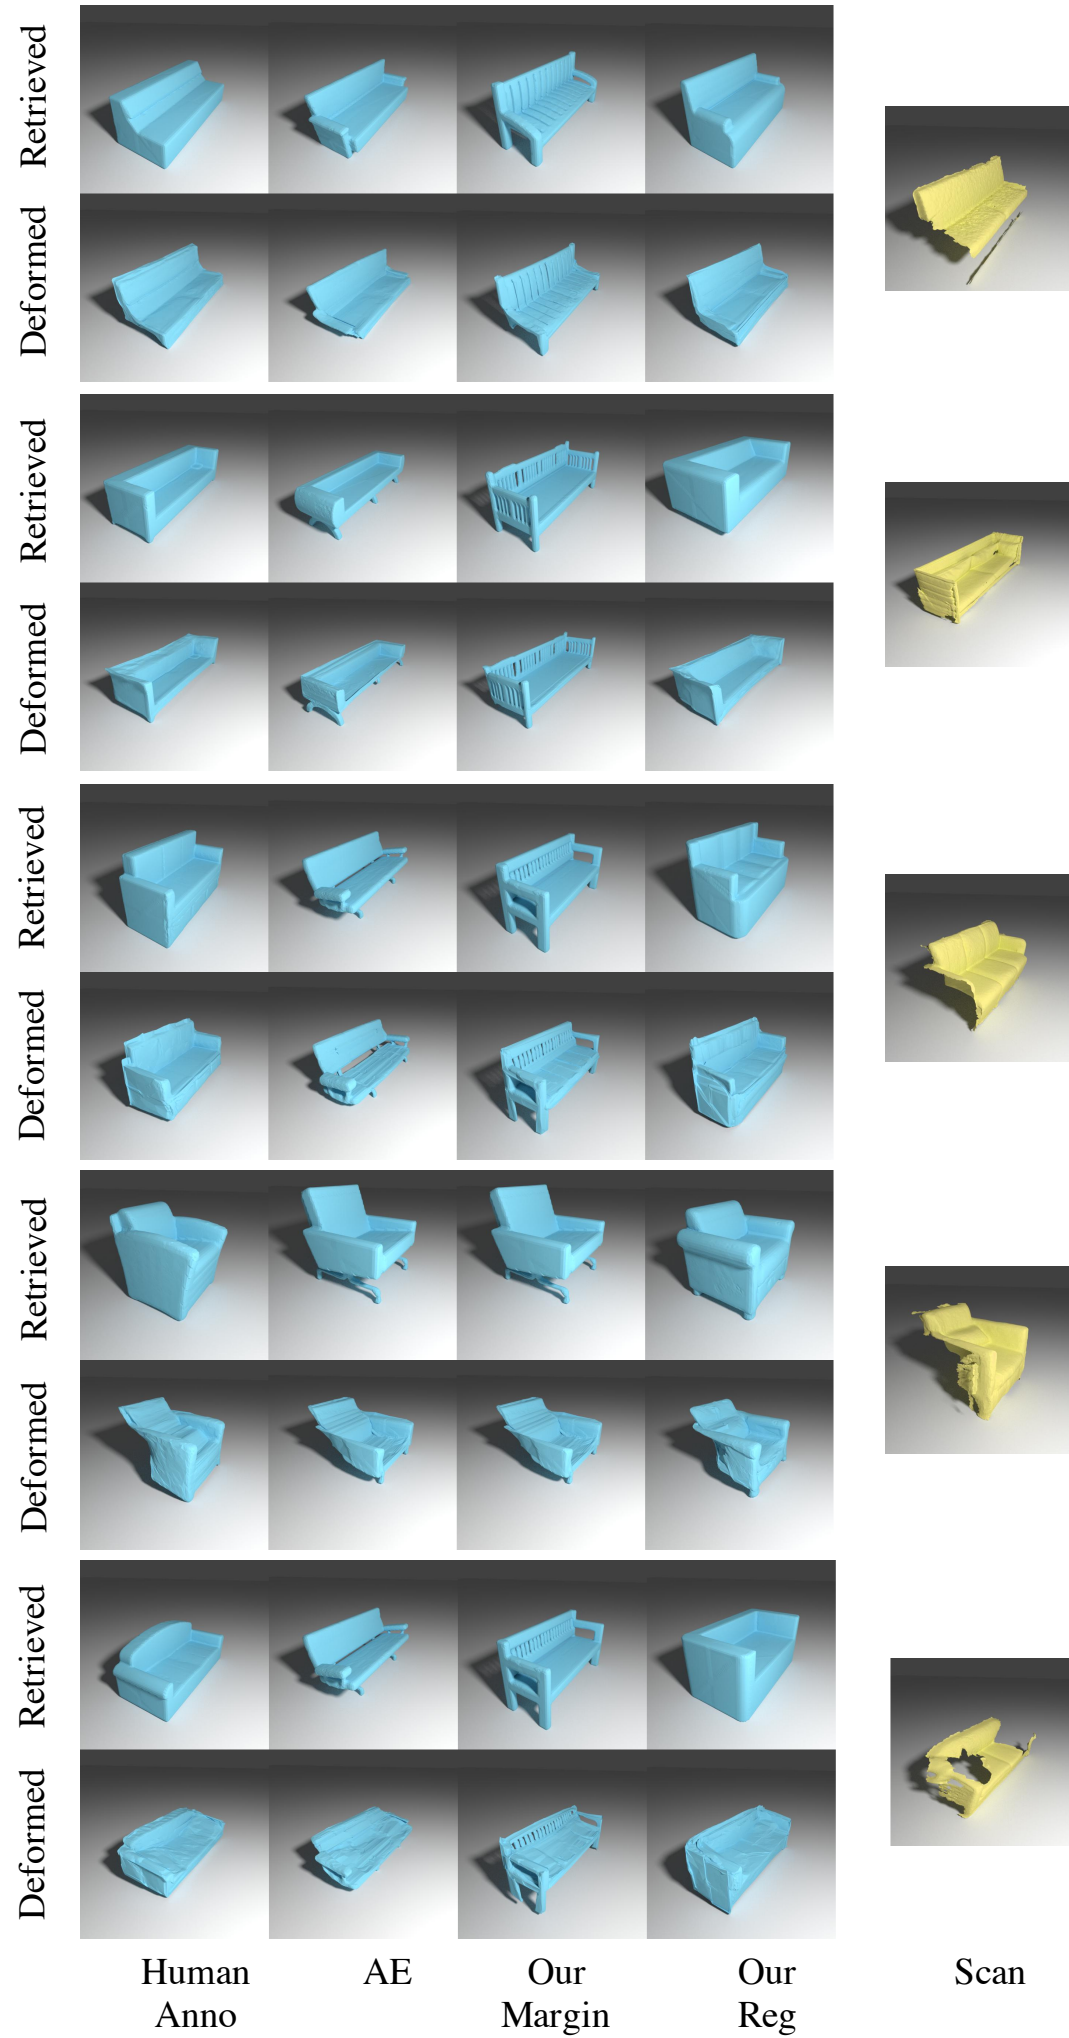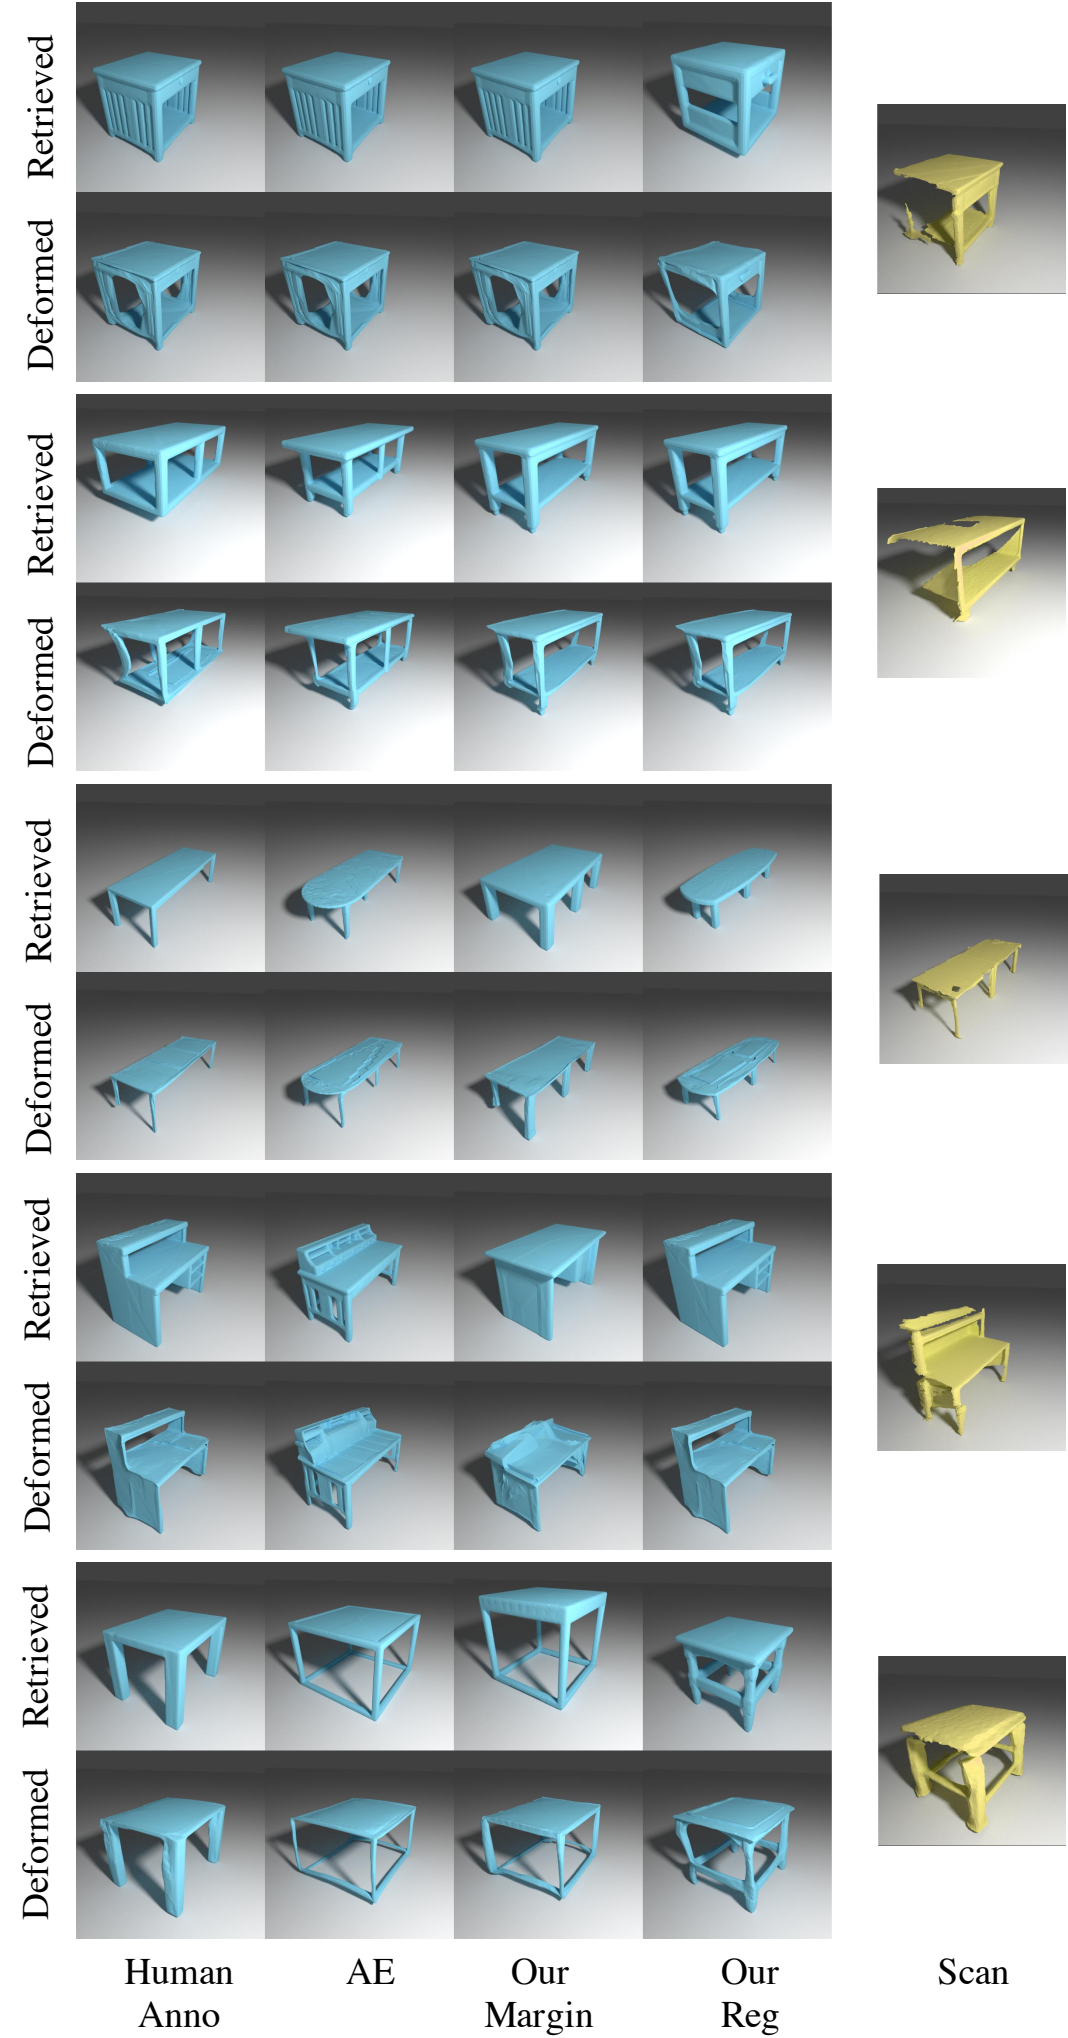

Supplement: Supplementary file 1 [file 123520392-supp.zip]

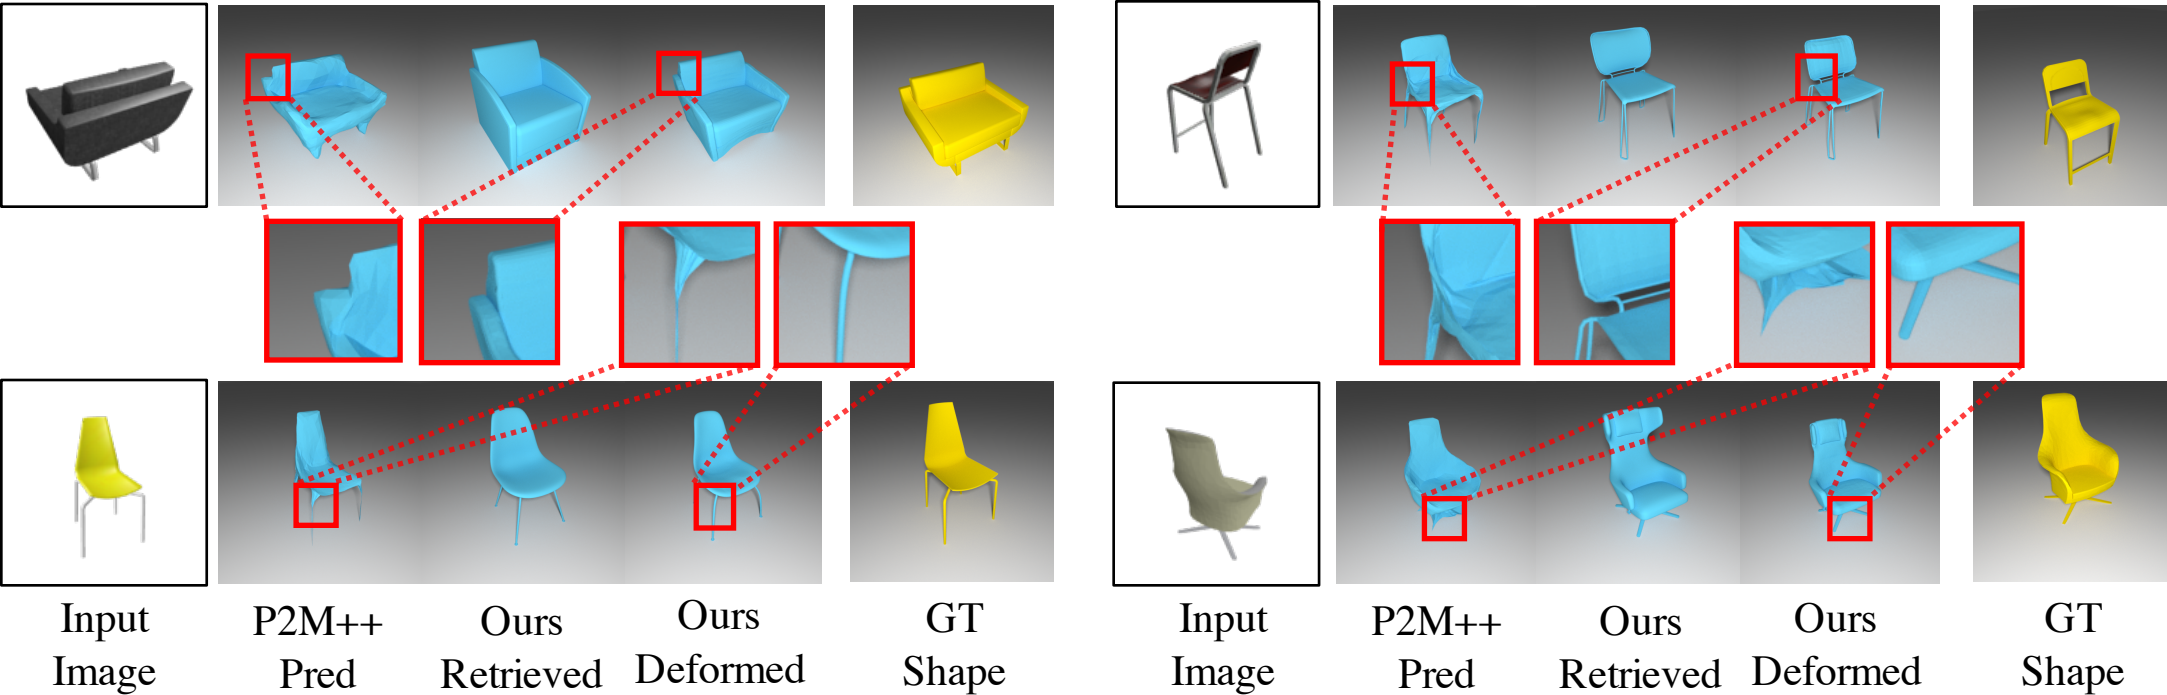

Supplement: Supplementary file 3 [file 123520392-supp.zip]

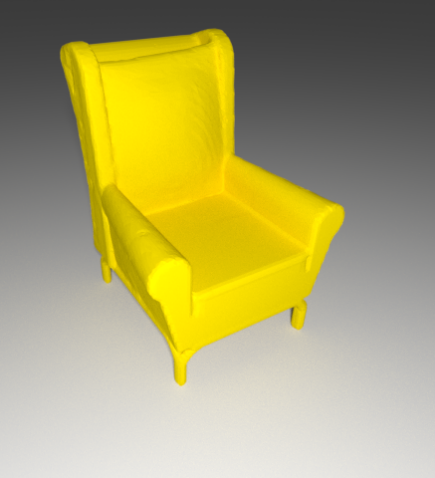

(a) Query

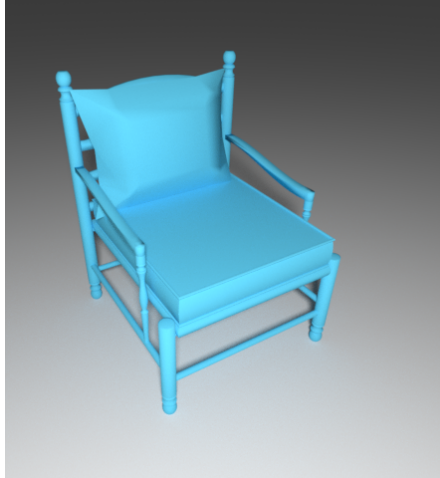

(b) Closest

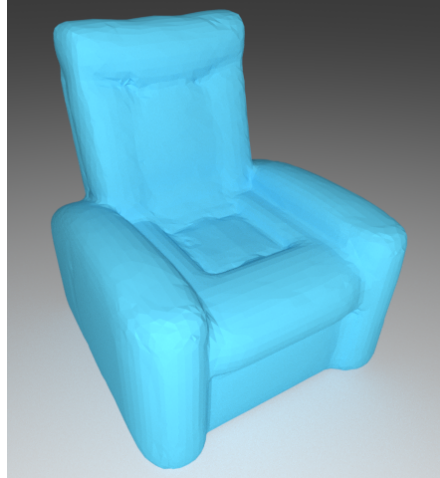

(c) Retrieved

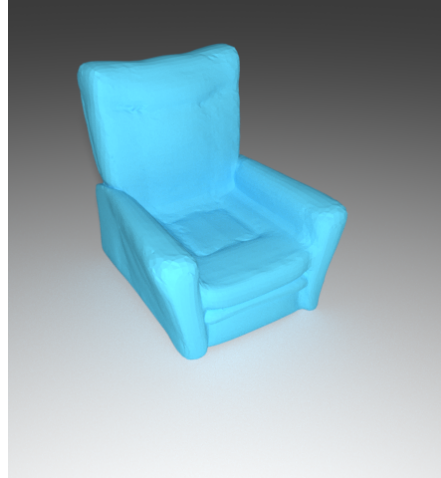

(d) Deformed

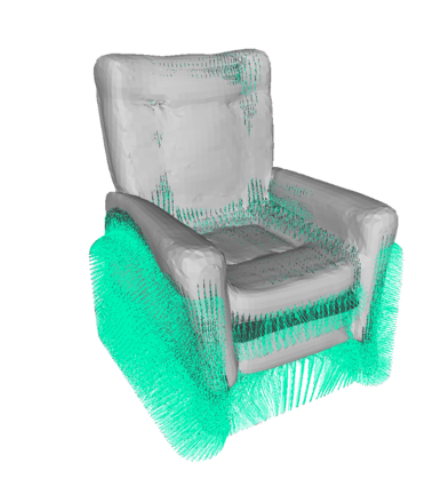

(e) Deform. Flow

Supplement: Supplementary file 6 [file 123520392-supp.zip]

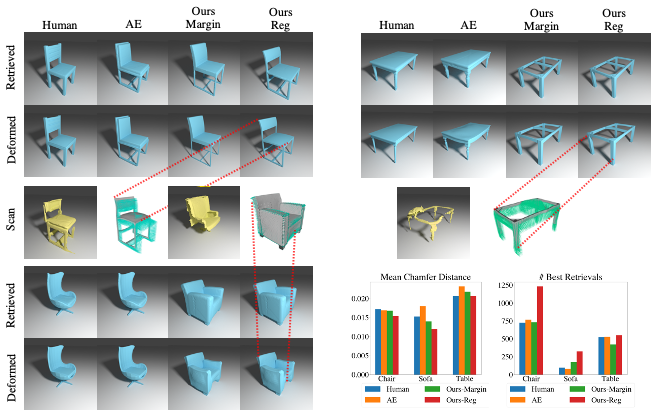

Supplement: Supplementary file 7 [file 123520392-supp.zip]

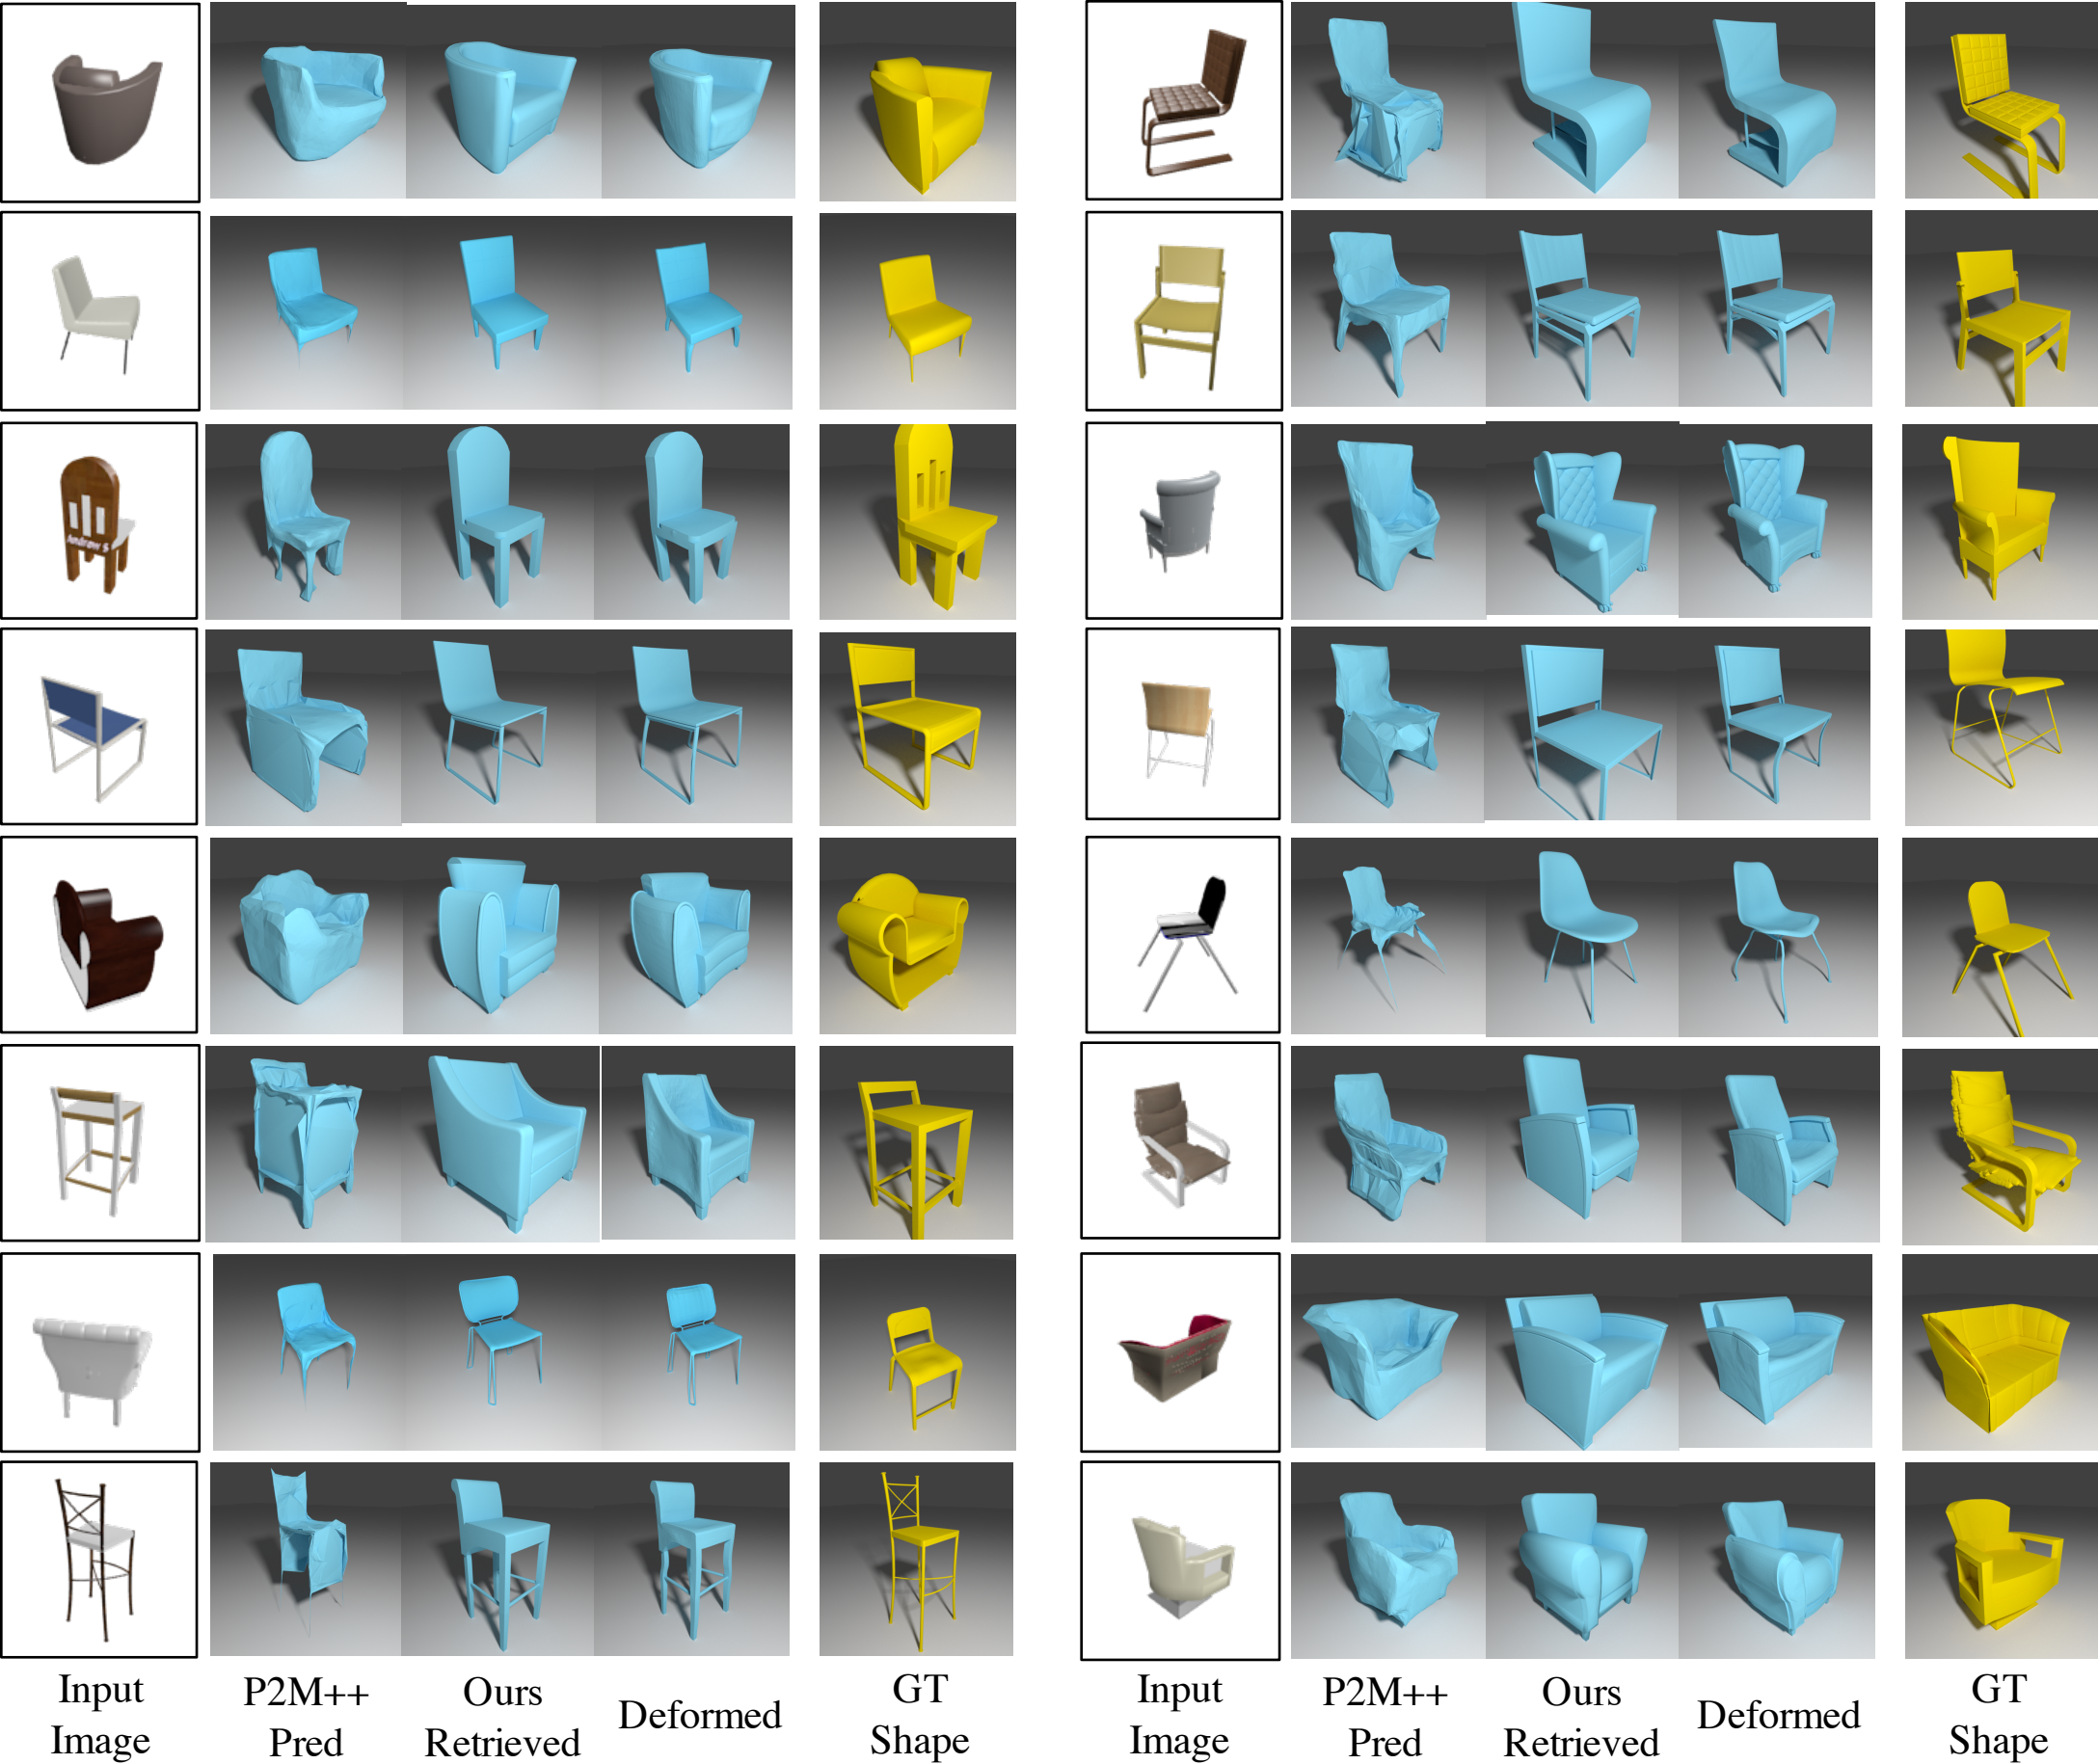

Supplement: Supplementary file 8 [file 123520392-supp.zip]

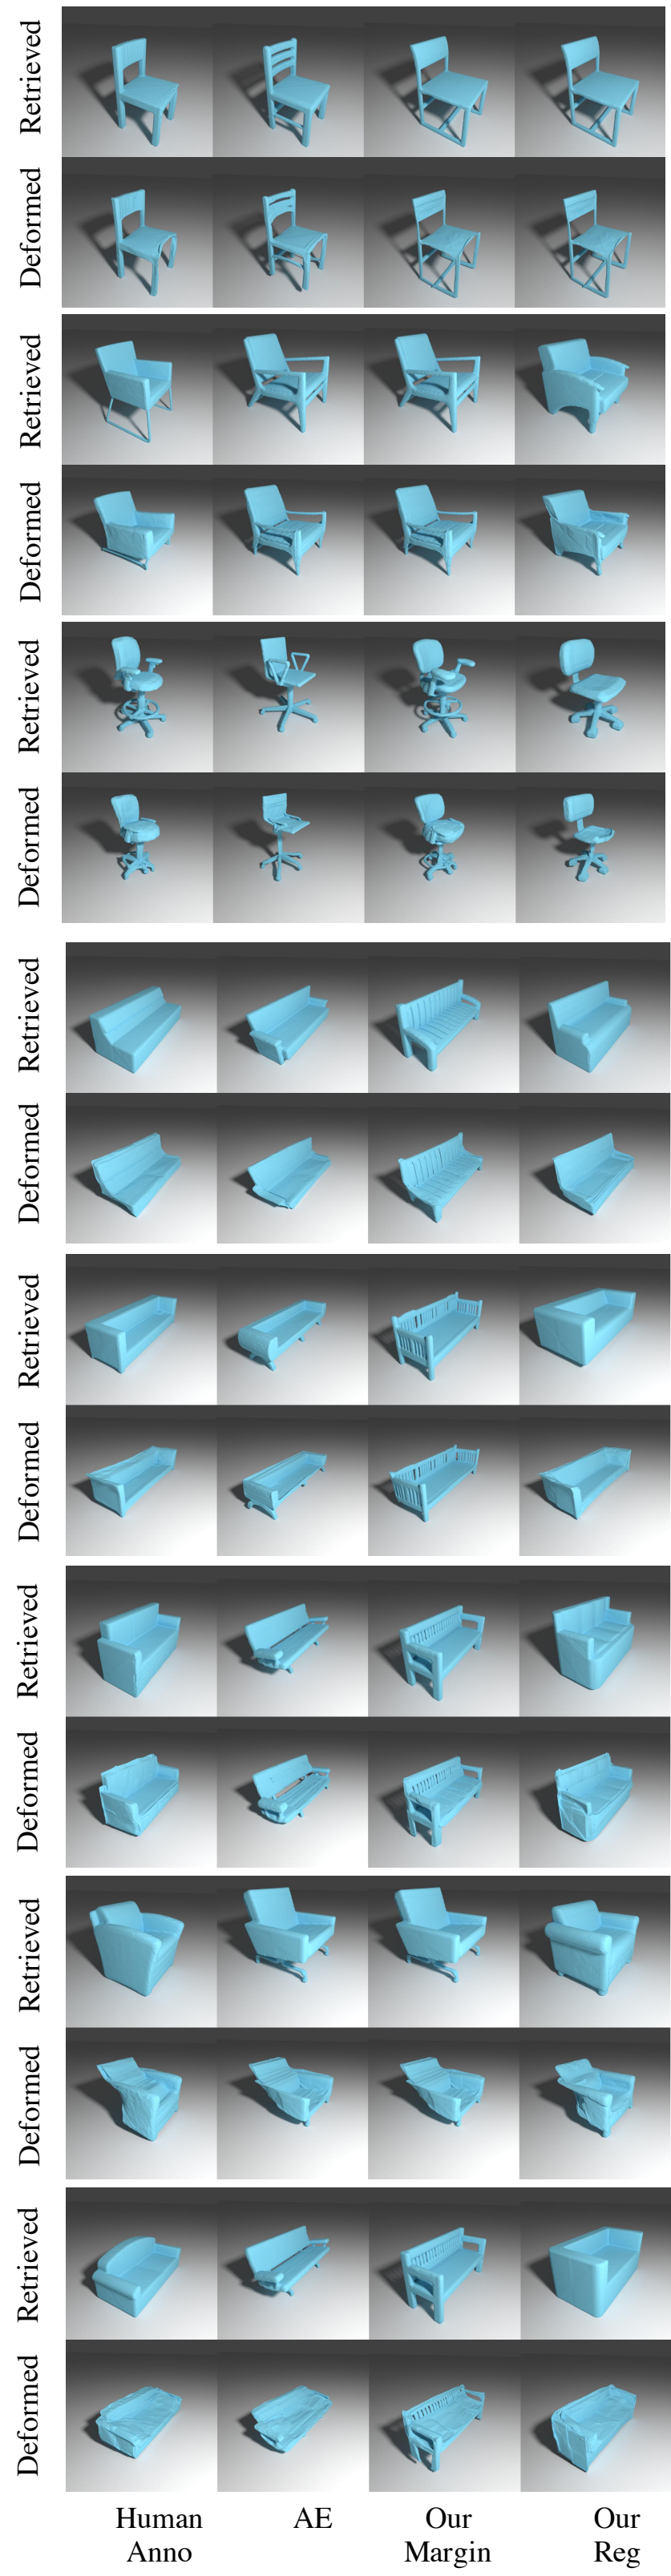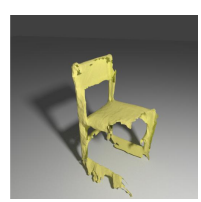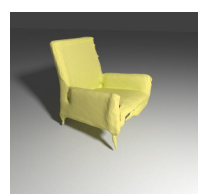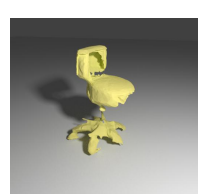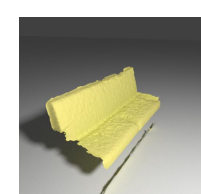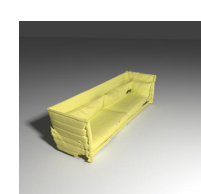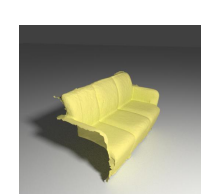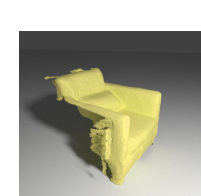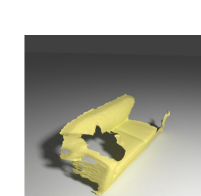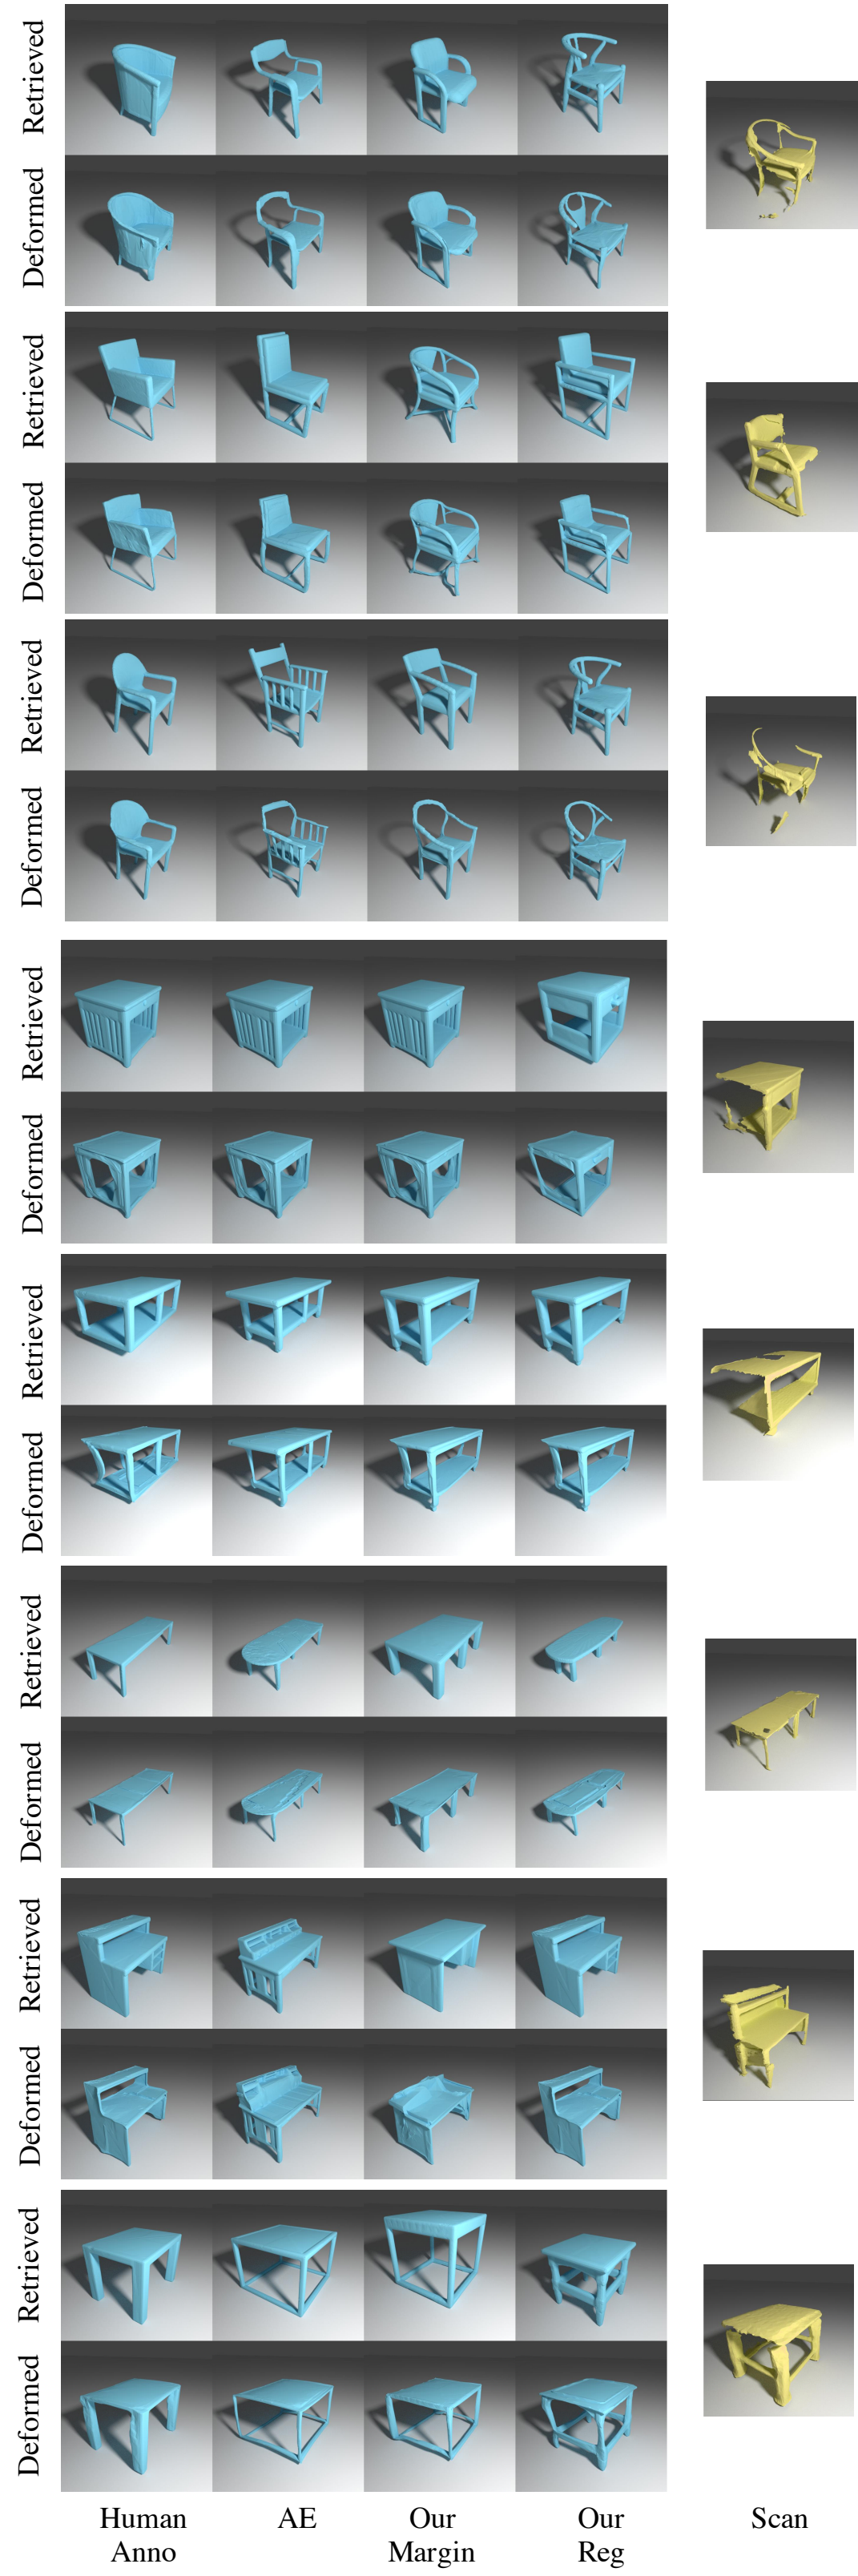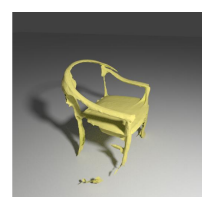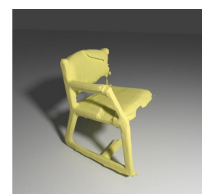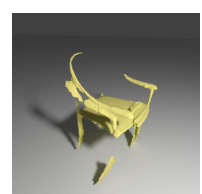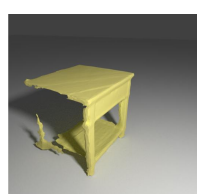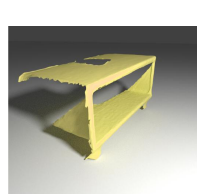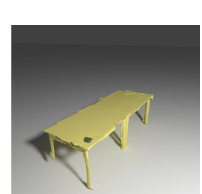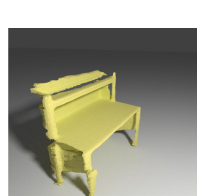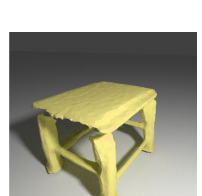

Human  
Anno

AE

Our  
Margin

Our  
Reg

Scan

Human  
Anno

AE

Our  
Margin

Our  
Reg

Scan

Supplement: Supplementary file 9 [file 123520392-supp.zip]

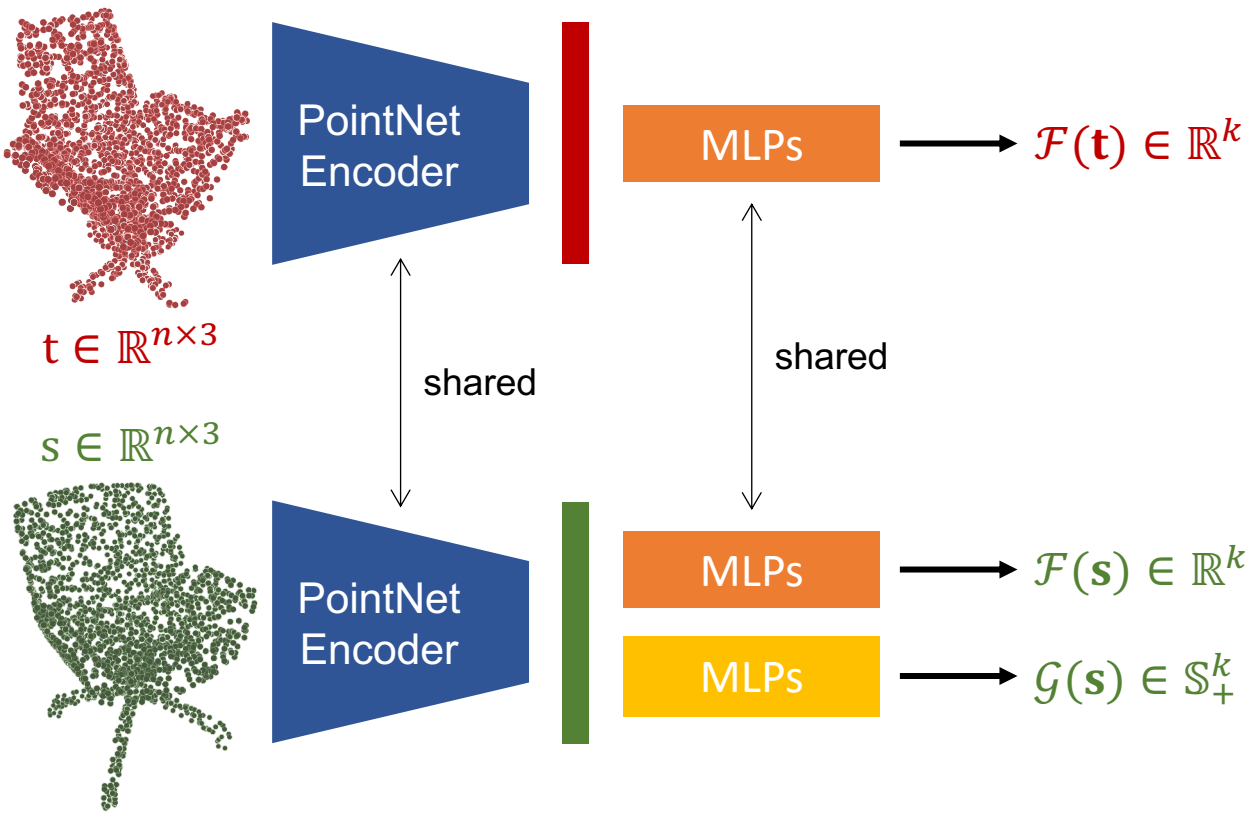

Supplement: Supplementary file 10 [file 123520392-supp.zip]

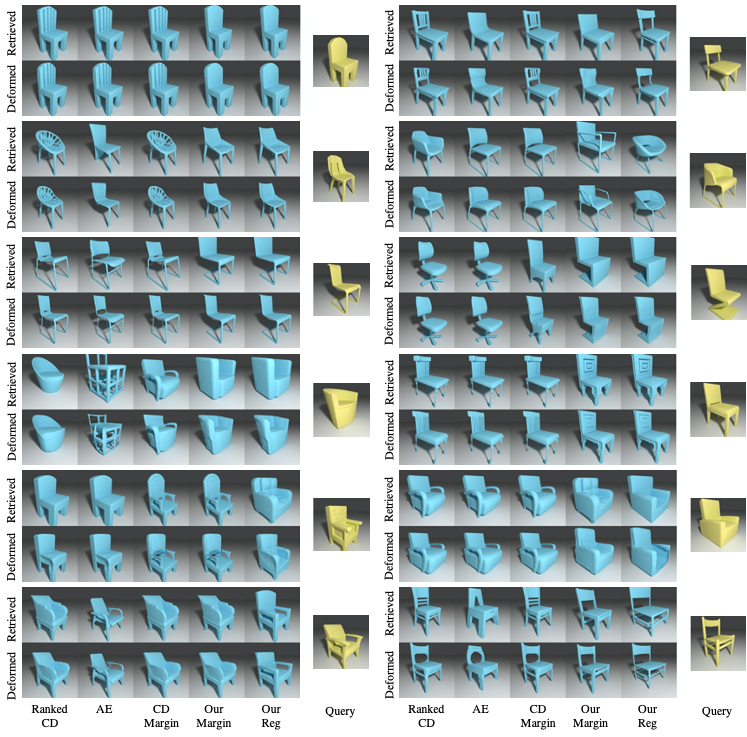

Supplement: Supplementary file 11 [file 123520392-supp.zip]

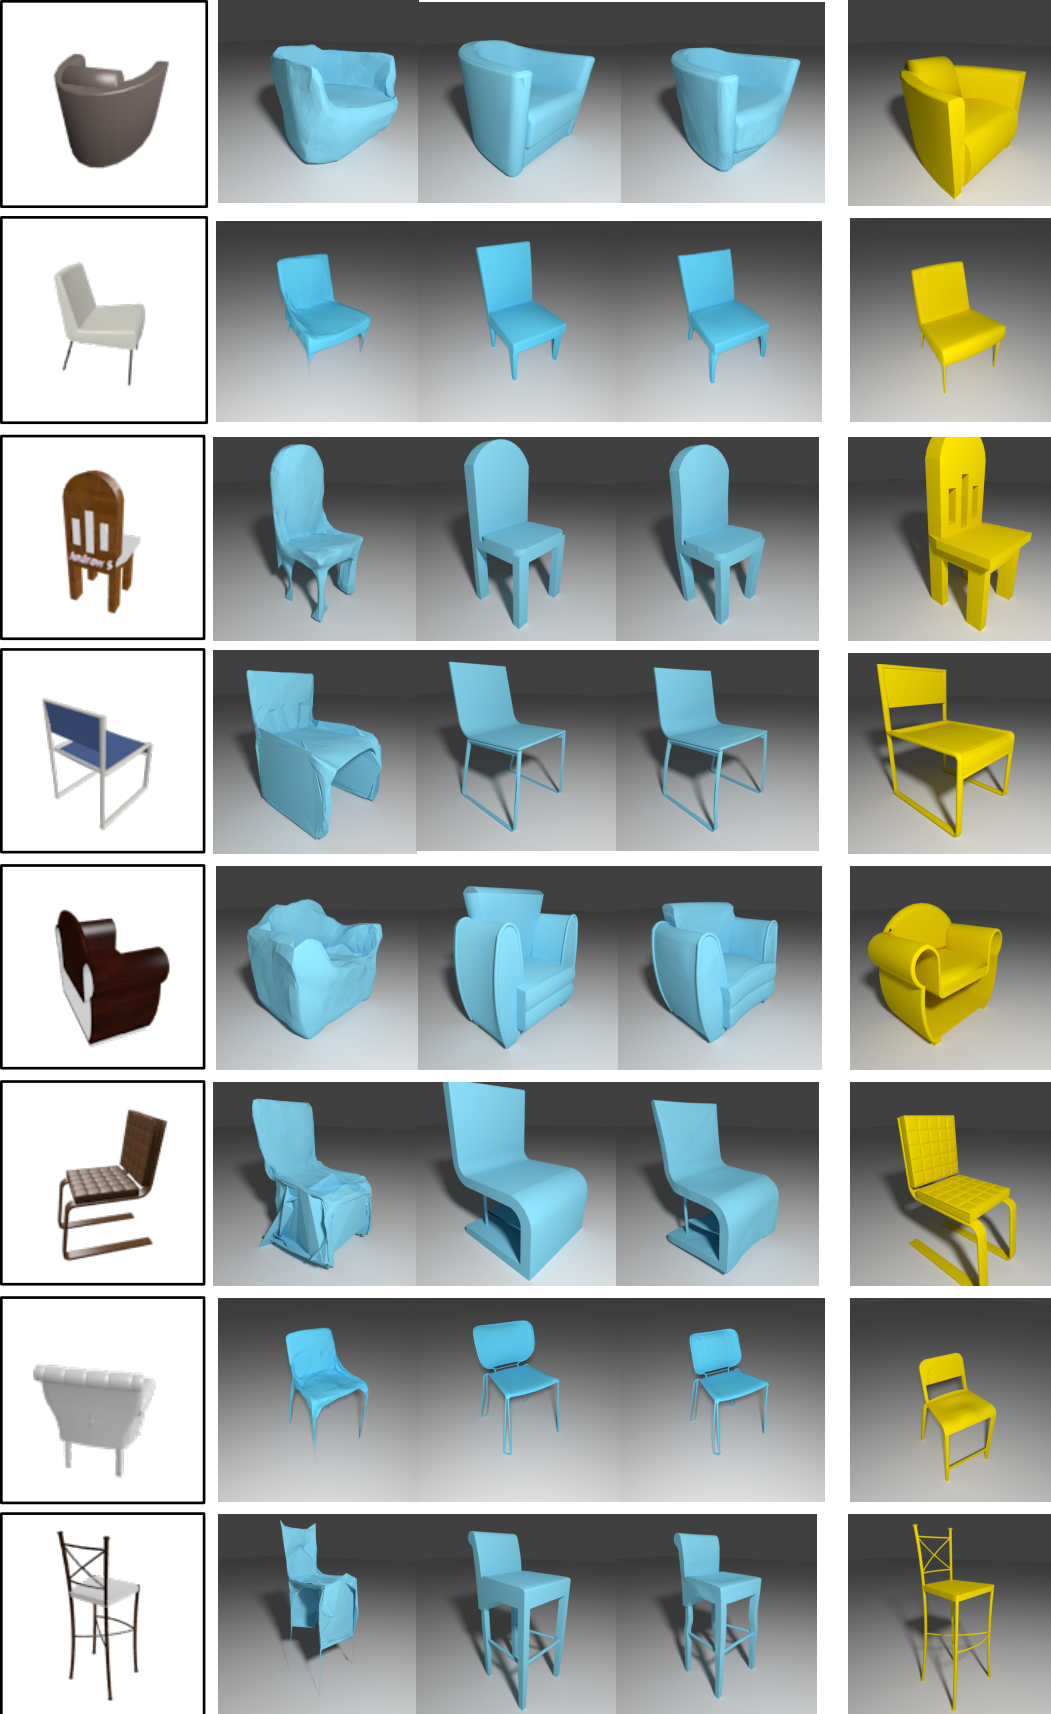

Input  
Image

P2M++  
Pred

Ours  
Retrieved

Deformed

GT  
Shape

Supplement: Supplementary file 12 [file 123520392-supp.zip]

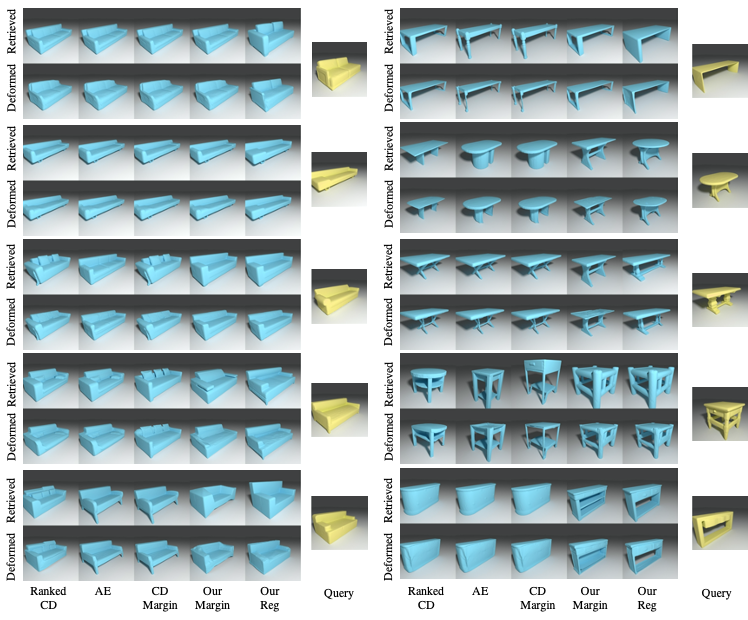

Supplement: Supplementary file 13 [file 123520392-supp.zip]

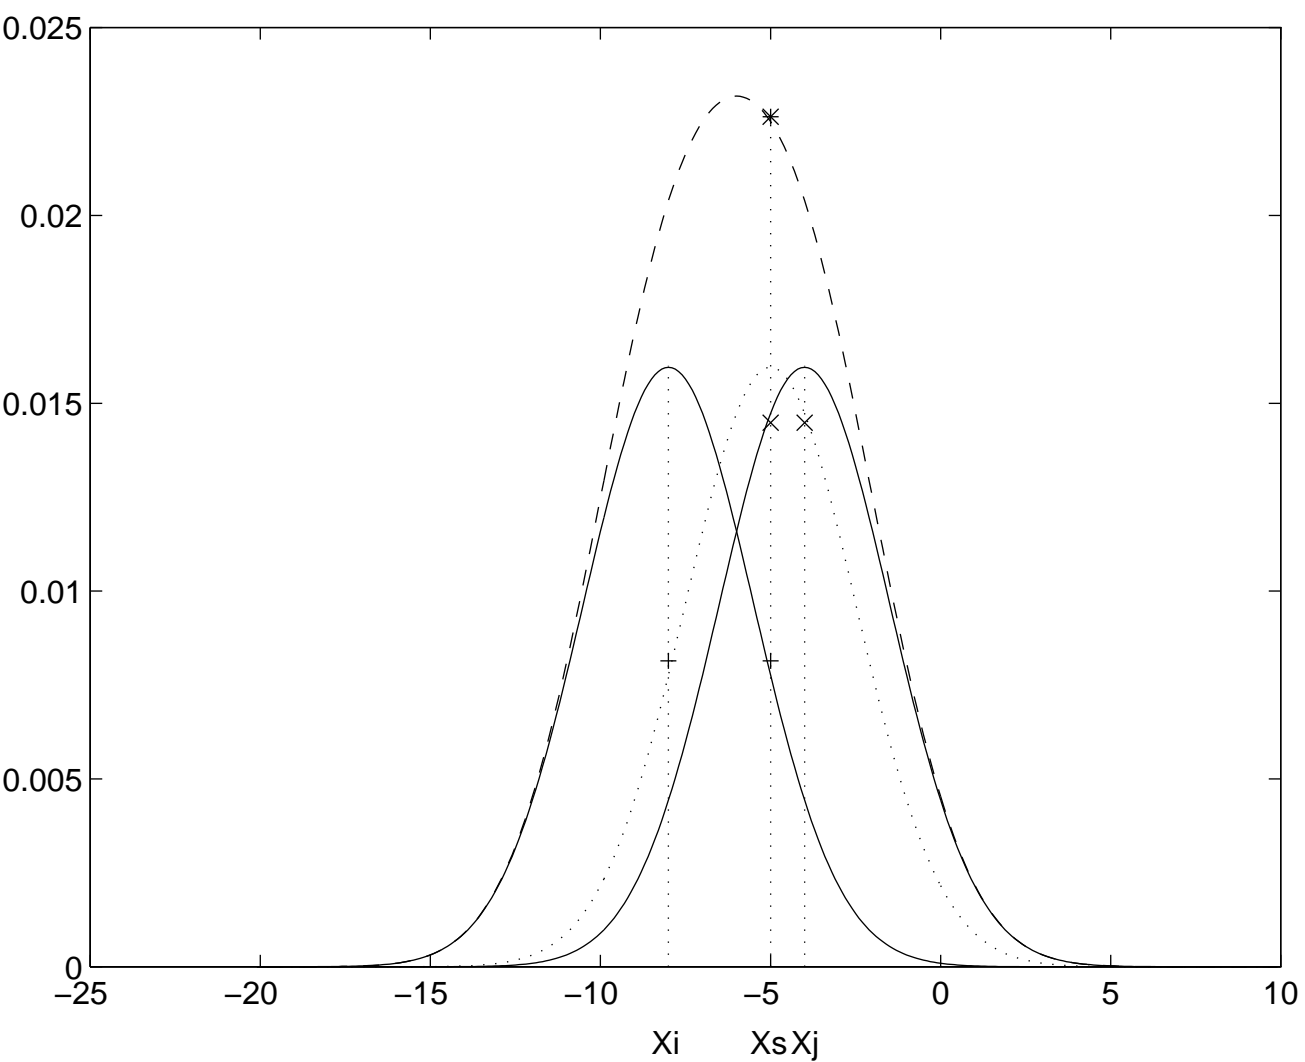

Supplement: Supplementary file 16 [file 123520392-supp.zip]

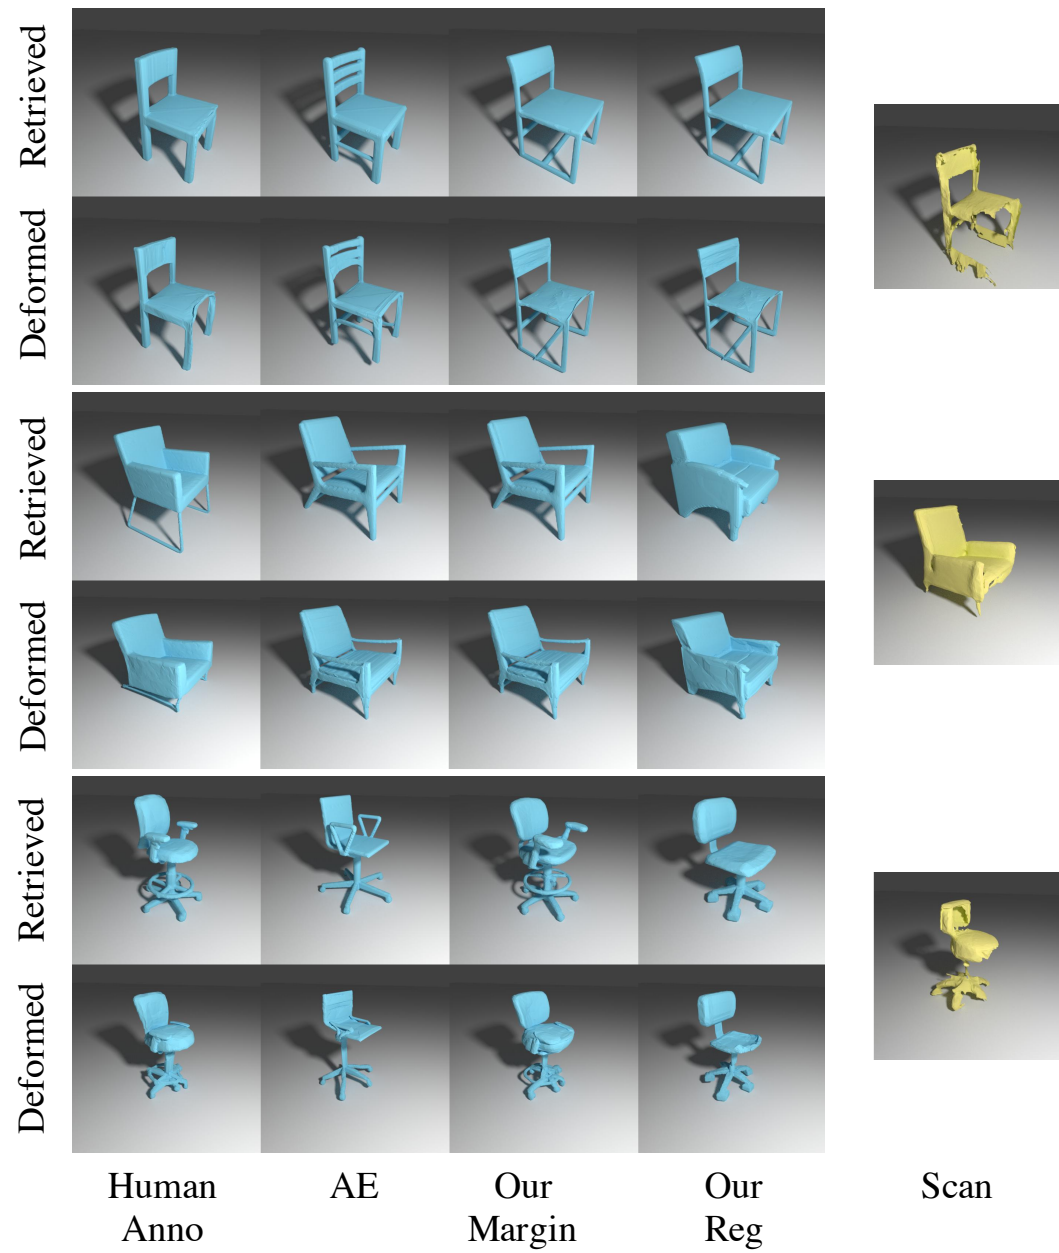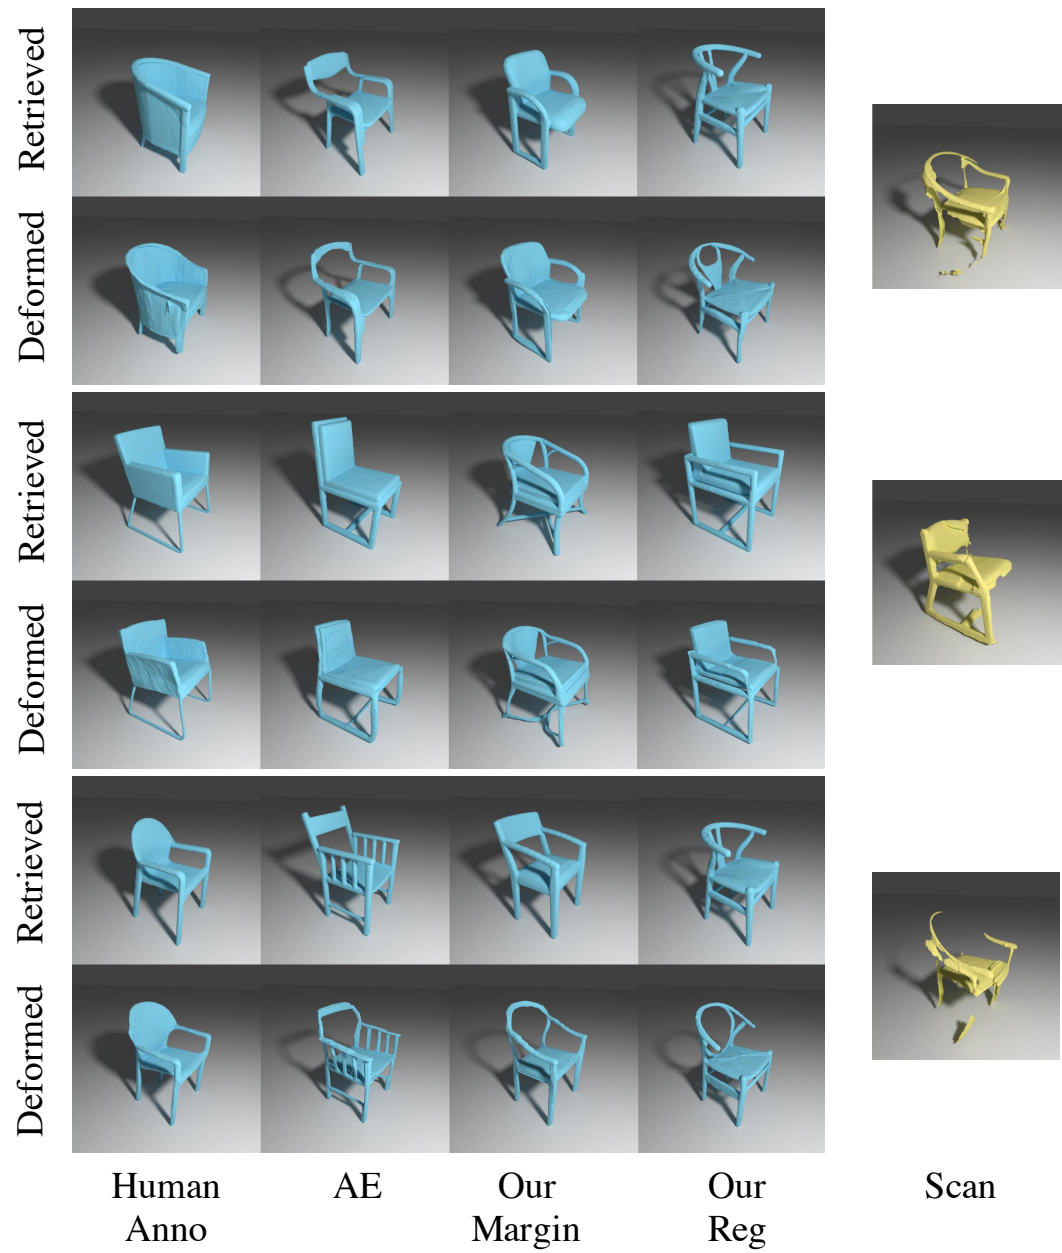

Supplement: Supplementary file 18 [file 123520392-supp.zip]

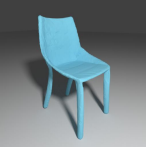

W.T.

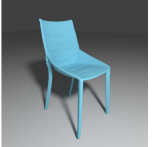

CAD

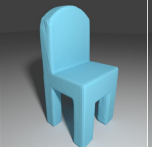

W.T.

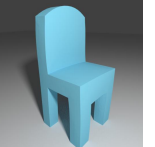

CAD

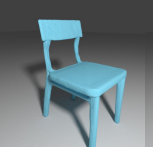

W.T.

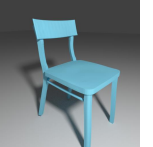

CAD

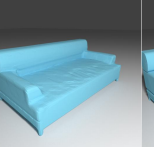

W.T.

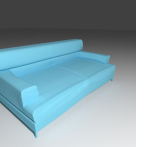

CAD

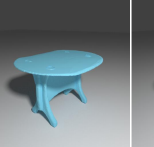

W.T.

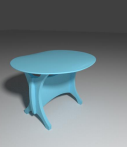

CAD

Supplement: Supplementary file 20 [file 123520392-supp.zip]

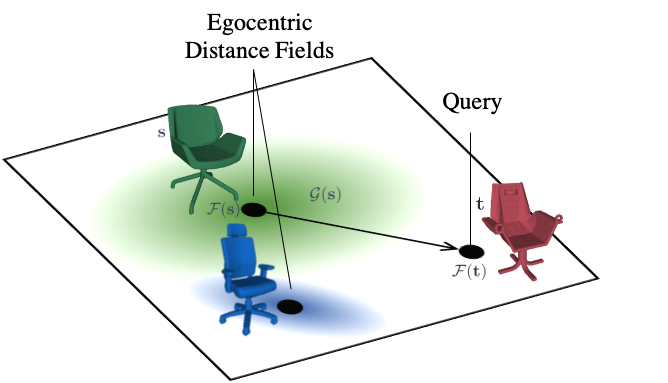

Supplement: Supplementary file 21 [file 123520392-supp.zip › 0264-supp/figures/embedding_v2.png]

Retrieved  
Deformed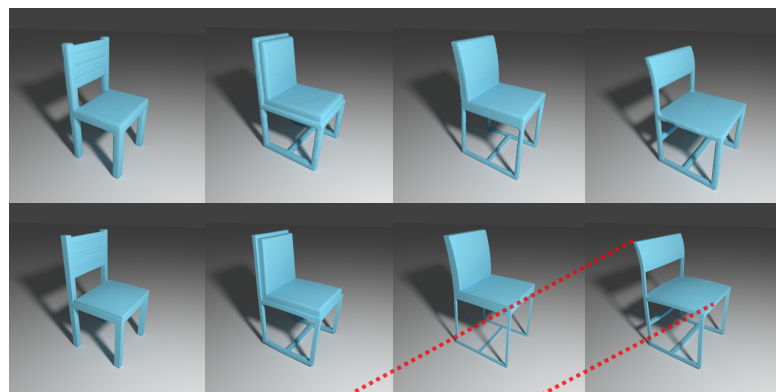

Scan

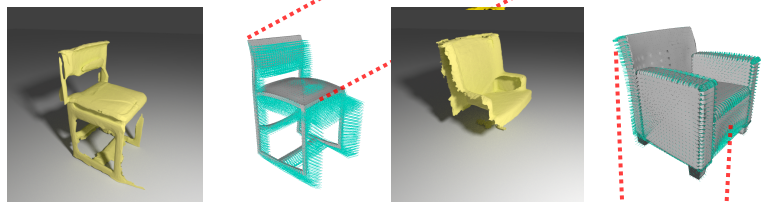Retrieved  
Deformed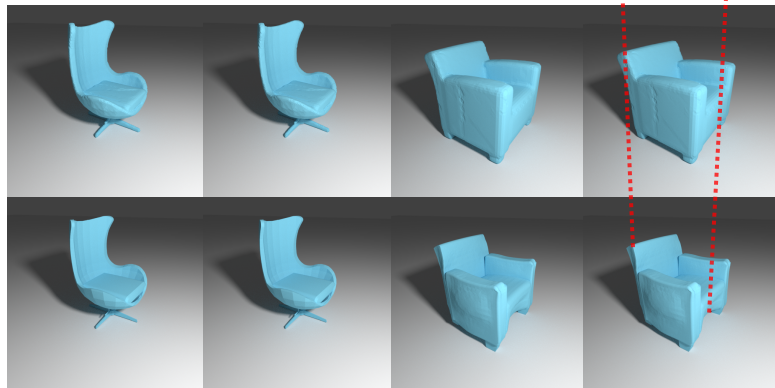

Human AE Ours Margin Ours Reg

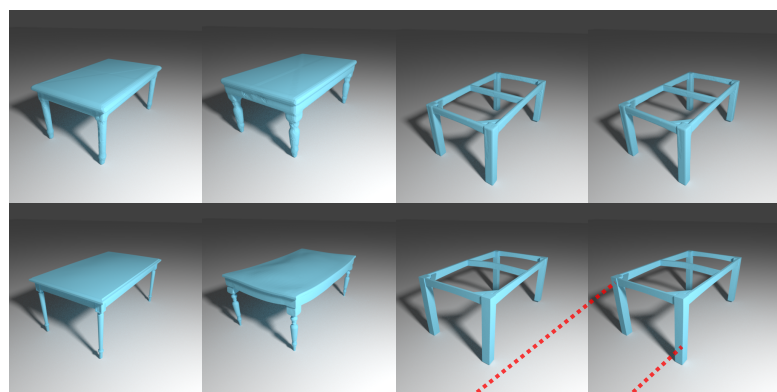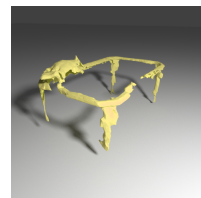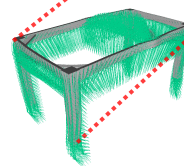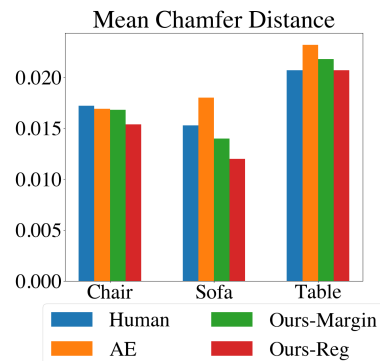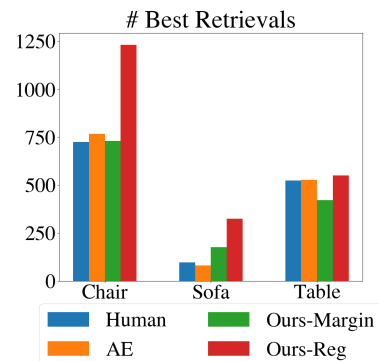

Supplement: Supplementary file 21 [file 123520392-supp.zip › 0264-supp/figures/scan2cad_fixed.pdf]

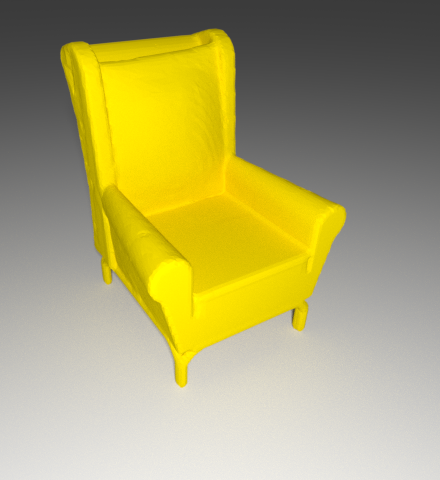

Supplement: Supplementary file 21 [file 123520392-supp.zip › 0264-supp/figures/teaser/teaser_1.png]

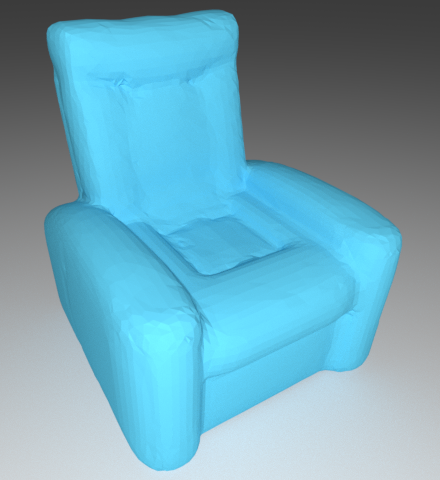

Supplement: Supplementary file 21 [file 123520392-supp.zip › 0264-supp/figures/teaser/teaser_3.png]

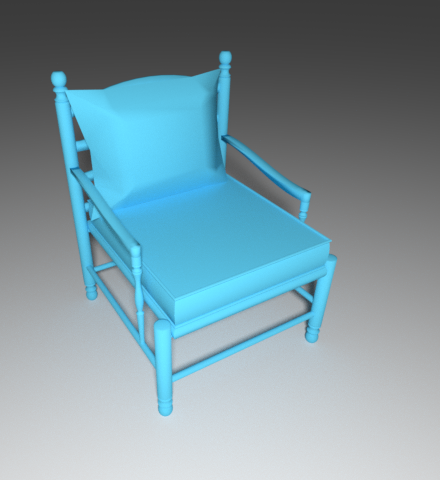

Supplement: Supplementary file 21 [file 123520392-supp.zip › 0264-supp/figures/teaser/teaser_2.png]

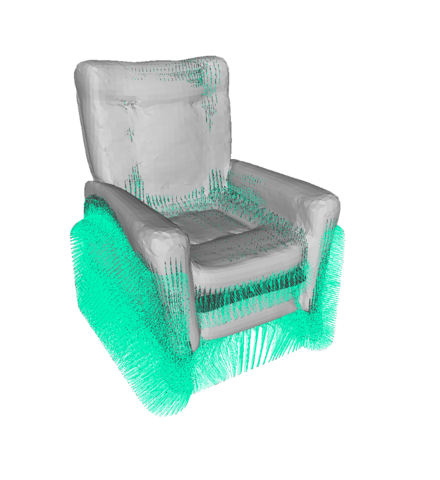

Supplement: Supplementary file 21 [file 123520392-supp.zip › 0264-supp/figures/teaser/teaser_5.png]

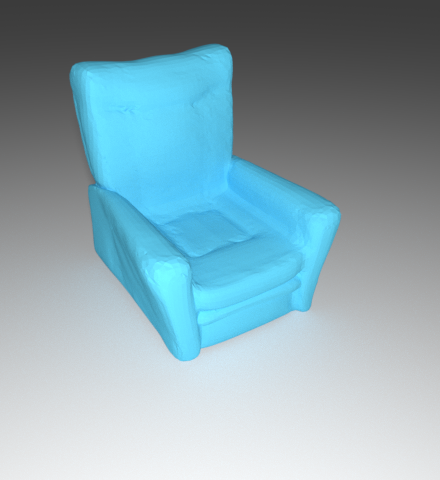

Supplement: Supplementary file 21 [file 123520392-supp.zip › 0264-supp/figures/teaser/teaser_4.png]

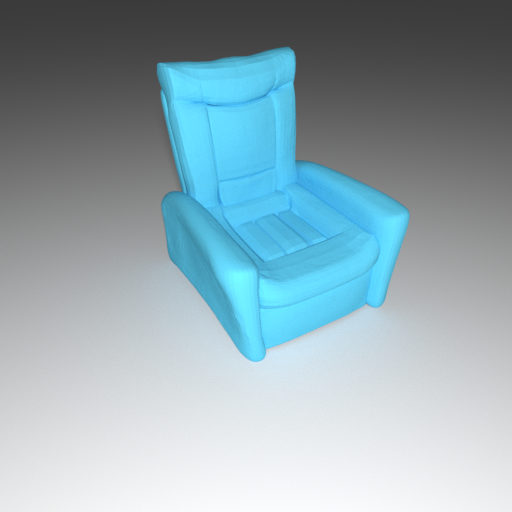

Supplement: Supplementary file 21 [file 123520392-supp.zip › 0264-supp/figures/teaser/source/teaser1.png]

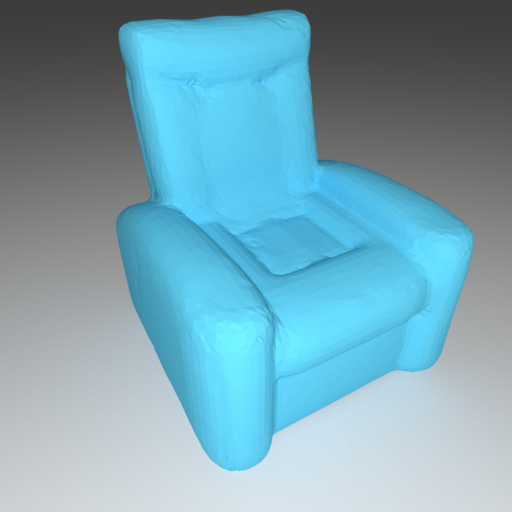

Supplement: Supplementary file 21 [file 123520392-supp.zip › 0264-supp/figures/teaser/source/source2.png]

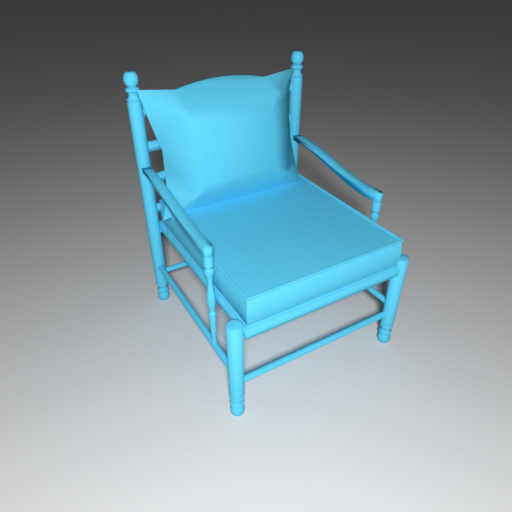

Supplement: Supplementary file 21 [file 123520392-supp.zip › 0264-supp/figures/teaser/source/closest_cad_new.png]

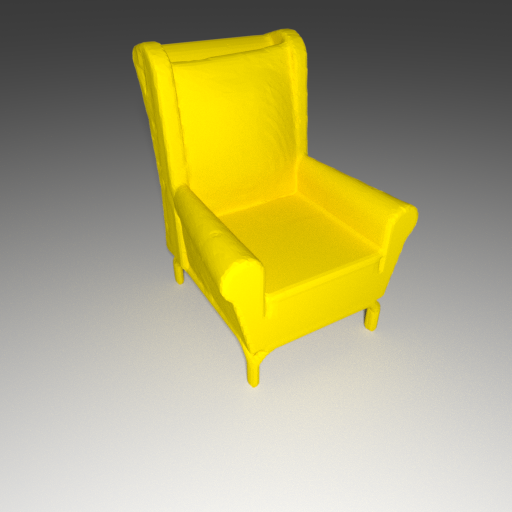

Supplement: Supplementary file 21 [file 123520392-supp.zip › 0264-supp/figures/teaser/source/reference_new_yellow.png]

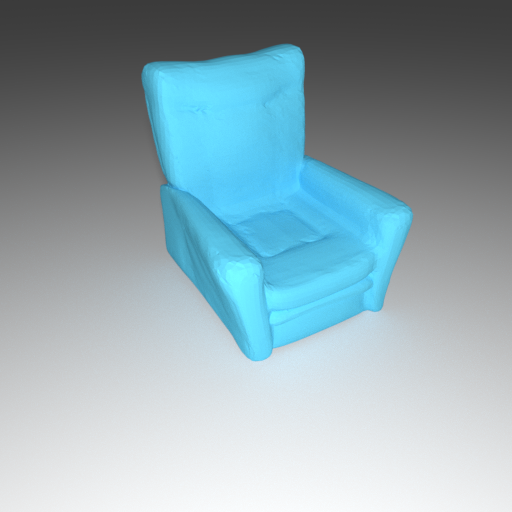

Supplement: Supplementary file 21 [file 123520392-supp.zip › 0264-supp/figures/teaser/source/teaser1_manifold.png]
